# Supplementary material
Source: publisher site journal article supplement (https://www.dovepress.com/article/253777)
Supplement: Supplementary file 1 [file get_supplementary_file.php]

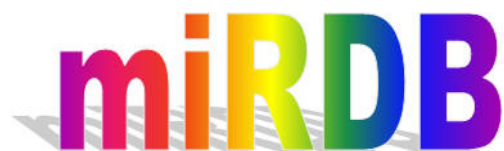

---

There are 657 predicted targets for hsa-miR-138-5p in miRDB.

---

| Target Detail           | Target Rank | Target Score | miRNA Name     | Gene Symbol              | Gene Description                                  |
|-------------------------|-------------|--------------|----------------|--------------------------|---------------------------------------------------|
| <a href="#">Details</a> | 1           | 98           | hsa-miR-138-5p | <a href="#">VSTM2L</a>   | V-set and transmembrane domain containing 2 like  |
| <a href="#">Details</a> | 2           | 98           | hsa-miR-138-5p | <a href="#">ANK1</a>     | ankyrin 1                                         |
| <a href="#">Details</a> | 3           | 98           | hsa-miR-138-5p | <a href="#">RMND5A</a>   | required for meiotic nuclear division 5 homolog A |
| <a href="#">Details</a> | 4           | 98           | hsa-miR-138-5p | <a href="#">THRB</a>     | thyroid hormone receptor beta                     |
| <a href="#">Details</a> | 5           | 98           | hsa-miR-138-5p | <a href="#">CLVS1</a>    | clavesin 1                                        |
| <a href="#">Details</a> | 6           | 98           | hsa-miR-138-5p | <a href="#">ARHGAP32</a> | Rho GTPase activating protein 32                  |
| <a href="#">Details</a> | 7           | 98           | hsa-miR-138-5p | <a href="#">UPF2</a>     | UPF2, regulator of nonsense mediated mRNA decay   |
| <a href="#">Details</a> | 8           | 97           | hsa-miR-138-5p | <a href="#">RARA</a>     | retinoic acid receptor alpha                      |
| <a href="#">Details</a> | 9           | 97           | hsa-miR-138-5p | <a href="#">L3MBTL3</a>  | L3MBTL3, histone methyl-lysine binding protein    |
| <a href="#">Details</a> | 10          | 97           | hsa-miR-138-5p | <a href="#">CNOT6L</a>   | CCR4-NOT transcription complex subunit 6 like     |
| <a href="#">Details</a> | 11          | 97           | hsa-miR-138-5p | <a href="#">FOXC1</a>    | forkhead box C1                                   |
| <a href="#">Details</a> | 12          | 97           | hsa-miR-138-5p | <a href="#">KLF11</a>    | Kruppel like factor 11                            |

|                         |    |    |                |                            |                                                                                                      |
|-------------------------|----|----|----------------|----------------------------|------------------------------------------------------------------------------------------------------|
| <a href="#">Details</a> | 13 | 96 | hsa-miR-138-5p | <a href="#">SOGA1</a>      | suppressor of glucose, autophagy associated 1                                                        |
| <a href="#">Details</a> | 14 | 96 | hsa-miR-138-5p | <a href="#">KMT5B</a>      | lysine methyltransferase 5B                                                                          |
| <a href="#">Details</a> | 15 | 96 | hsa-miR-138-5p | <a href="#">NPPC</a>       | natriuretic peptide C                                                                                |
| <a href="#">Details</a> | 16 | 96 | hsa-miR-138-5p | <a href="#">DESI2</a>      | desumoylating isopeptidase 2                                                                         |
| <a href="#">Details</a> | 17 | 96 | hsa-miR-138-5p | <a href="#">CLN5</a>       | CLN5, intracellular trafficking protein                                                              |
| <a href="#">Details</a> | 18 | 95 | hsa-miR-138-5p | <a href="#">TMOD2</a>      | tropomodulin 2                                                                                       |
| <a href="#">Details</a> | 19 | 95 | hsa-miR-138-5p | <a href="#">USP10</a>      | ubiquitin specific peptidase 10                                                                      |
| <a href="#">Details</a> | 20 | 95 | hsa-miR-138-5p | <a href="#">SIN3A</a>      | SIN3 transcription regulator family member A                                                         |
| <a href="#">Details</a> | 21 | 95 | hsa-miR-138-5p | <a href="#">PLXNB2</a>     | plexin B2                                                                                            |
| <a href="#">Details</a> | 22 | 95 | hsa-miR-138-5p | <a href="#">AMMECR1</a>    | Alport syndrome, mental retardation, midface hypoplasia and elliptocytosis chromosomal region gene 1 |
| <a href="#">Details</a> | 23 | 95 | hsa-miR-138-5p | <a href="#">ATP11C</a>     | ATPase phospholipid transporting 11C                                                                 |
| <a href="#">Details</a> | 24 | 95 | hsa-miR-138-5p | <a href="#">AGO1</a>       | argonaute RISC catalytic component 1                                                                 |
| <a href="#">Details</a> | 25 | 95 | hsa-miR-138-5p | <a href="#">NFIX</a>       | nuclear factor I X                                                                                   |
| <a href="#">Details</a> | 26 | 95 | hsa-miR-138-5p | <a href="#">ST6GALNAC4</a> | ST6 N-acetylgalactosaminide alpha-2,6-sialyltransferase 4                                            |
| <a href="#">Details</a> | 27 | 94 | hsa-miR-138-5p | <a href="#">ZEB2</a>       | zinc finger E-box binding homeobox 2                                                                 |
| <a href="#">Details</a> | 28 | 94 | hsa-miR-138-5p | <a href="#">VIM</a>        | vimentin                                                                                             |
| <a href="#">Details</a> | 29 | 94 | hsa-miR-138-5p | <a href="#">FEM1C</a>      | fem-1 homolog C                                                                                      |
| <a href="#">Details</a> | 30 | 94 | hsa-miR-138-5p | <a href="#">MTF2</a>       | metal response element binding transcription factor 2                                                |
| <a href="#">Details</a> | 31 | 94 | hsa-miR-138-5p | <a href="#">SH2B3</a>      | SH2B adaptor protein 3                                                                               |
| <a href="#">Details</a> | 32 | 94 | hsa-miR-138-5p | <a href="#">ARHGAP6</a>    | Rho GTPase activating protein 6                                                                      |
| <a href="#">Details</a> | 33 | 94 | hsa-miR-138-5p | <a href="#">GTPBP1</a>     | GTP binding protein 1                                                                                |

|                         |    |    |                |                           |                                                         |
|-------------------------|----|----|----------------|---------------------------|---------------------------------------------------------|
| <a href="#">Details</a> | 34 | 94 | hsa-miR-138-5p | <a href="#">TIPARP</a>    | TCDD inducible poly(ADP-ribose) polymerase              |
| <a href="#">Details</a> | 35 | 94 | hsa-miR-138-5p | <a href="#">UNC5A</a>     | unc-5 netrin receptor A                                 |
| <a href="#">Details</a> | 36 | 94 | hsa-miR-138-5p | <a href="#">LZTS3</a>     | leucine zipper tumor suppressor family member 3         |
| <a href="#">Details</a> | 37 | 94 | hsa-miR-138-5p | <a href="#">PDE3A</a>     | phosphodiesterase 3A                                    |
| <a href="#">Details</a> | 38 | 94 | hsa-miR-138-5p | <a href="#">RIMS2</a>     | regulating synaptic membrane exocytosis 2               |
| <a href="#">Details</a> | 39 | 94 | hsa-miR-138-5p | <a href="#">EID1</a>      | EP300 interacting inhibitor of differentiation 1        |
| <a href="#">Details</a> | 40 | 94 | hsa-miR-138-5p | <a href="#">LAYN</a>      | layilin                                                 |
| <a href="#">Details</a> | 41 | 94 | hsa-miR-138-5p | <a href="#">ILDR2</a>     | immunoglobulin like domain containing receptor 2        |
| <a href="#">Details</a> | 42 | 94 | hsa-miR-138-5p | <a href="#">DTX4</a>      | deltex E3 ubiquitin ligase 4                            |
| <a href="#">Details</a> | 43 | 93 | hsa-miR-138-5p | <a href="#">SPTB</a>      | spectrin beta, erythrocytic                             |
| <a href="#">Details</a> | 44 | 93 | hsa-miR-138-5p | <a href="#">CLIP1</a>     | CAP-Gly domain containing linker protein 1              |
| <a href="#">Details</a> | 45 | 93 | hsa-miR-138-5p | <a href="#">MTUS2</a>     | microtubule associated scaffold protein 2               |
| <a href="#">Details</a> | 46 | 93 | hsa-miR-138-5p | <a href="#">AKAP11</a>    | A-kinase anchoring protein 11                           |
| <a href="#">Details</a> | 47 | 93 | hsa-miR-138-5p | <a href="#">ADCYAP1R1</a> | ADCYAP receptor type I                                  |
| <a href="#">Details</a> | 48 | 93 | hsa-miR-138-5p | <a href="#">GNG2</a>      | G protein subunit gamma 2                               |
| <a href="#">Details</a> | 49 | 93 | hsa-miR-138-5p | <a href="#">PPARD</a>     | peroxisome proliferator activated receptor delta        |
| <a href="#">Details</a> | 50 | 93 | hsa-miR-138-5p | <a href="#">CCND3</a>     | cyclin D3                                               |
| <a href="#">Details</a> | 51 | 93 | hsa-miR-138-5p | <a href="#">DNAJB6</a>    | DnaJ heat shock protein family (Hsp40) member B6        |
| <a href="#">Details</a> | 52 | 93 | hsa-miR-138-5p | <a href="#">GGCX</a>      | gamma-glutamyl carboxylase                              |
| <a href="#">Details</a> | 53 | 93 | hsa-miR-138-5p | <a href="#">UNC5D</a>     | unc-5 netrin receptor D                                 |
| <a href="#">Details</a> | 54 | 92 | hsa-miR-138-5p | <a href="#">TMTC4</a>     | transmembrane and tetratricopeptide repeat containing 4 |
| <a href="#">Details</a> | 55 | 92 | hsa-miR-138-5p | <a href="#">ITGAL</a>     | integrin subunit alpha L                                |

|                         |    |    |                |                          |                                                                      |
|-------------------------|----|----|----------------|--------------------------|----------------------------------------------------------------------|
| <a href="#">Details</a> | 56 | 92 | hsa-miR-138-5p | <a href="#">SIGLECL1</a> | SIGLEC family like 1                                                 |
| <a href="#">Details</a> | 57 | 92 | hsa-miR-138-5p | <a href="#">PDIK1L</a>   | PDLIM1 interacting kinase 1 like                                     |
| <a href="#">Details</a> | 58 | 92 | hsa-miR-138-5p | <a href="#">FERMT2</a>   | fermitin family member 2                                             |
| <a href="#">Details</a> | 59 | 92 | hsa-miR-138-5p | <a href="#">HK1</a>      | hexokinase 1                                                         |
| <a href="#">Details</a> | 60 | 92 | hsa-miR-138-5p | <a href="#">JMJD1C</a>   | jumonji domain containing 1C                                         |
| <a href="#">Details</a> | 61 | 92 | hsa-miR-138-5p | <a href="#">BAZ1B</a>    | bromodomain adjacent to zinc finger domain 1B                        |
| <a href="#">Details</a> | 62 | 92 | hsa-miR-138-5p | <a href="#">KLF12</a>    | Kruppel like factor 12                                               |
| <a href="#">Details</a> | 63 | 91 | hsa-miR-138-5p | <a href="#">CELF5</a>    | CUGBP Elav-like family member 5                                      |
| <a href="#">Details</a> | 64 | 91 | hsa-miR-138-5p | <a href="#">CALN1</a>    | calneuron 1                                                          |
| <a href="#">Details</a> | 65 | 91 | hsa-miR-138-5p | <a href="#">RB1CC1</a>   | RB1 inducible coiled-coil 1                                          |
| <a href="#">Details</a> | 66 | 91 | hsa-miR-138-5p | <a href="#">KBTBD4</a>   | kelch repeat and BTB domain containing 4                             |
| <a href="#">Details</a> | 67 | 91 | hsa-miR-138-5p | <a href="#">SLC35F1</a>  | solute carrier family 35 member F1                                   |
| <a href="#">Details</a> | 68 | 91 | hsa-miR-138-5p | <a href="#">NSMF</a>     | NMDA receptor synaptonuclear signaling and neuronal migration factor |
| <a href="#">Details</a> | 69 | 91 | hsa-miR-138-5p | <a href="#">ZNF385A</a>  | zinc finger protein 385A                                             |
| <a href="#">Details</a> | 70 | 91 | hsa-miR-138-5p | <a href="#">RELN</a>     | reelin                                                               |
| <a href="#">Details</a> | 71 | 91 | hsa-miR-138-5p | <a href="#">DCP1A</a>    | decapping mRNA 1A                                                    |
| <a href="#">Details</a> | 72 | 91 | hsa-miR-138-5p | <a href="#">LSM14A</a>   | LSM14A, mRNA processing body assembly factor                         |
| <a href="#">Details</a> | 73 | 90 | hsa-miR-138-5p | <a href="#">DEK</a>      | DEK proto-oncogene                                                   |
| <a href="#">Details</a> | 74 | 90 | hsa-miR-138-5p | <a href="#">SESN3</a>    | sestrin 3                                                            |
| <a href="#">Details</a> | 75 | 90 | hsa-miR-138-5p | <a href="#">PRRT4</a>    | proline rich transmembrane protein 4                                 |
| <a href="#">Details</a> | 76 | 90 | hsa-miR-138-5p | <a href="#">SULF2</a>    | sulfatase 2                                                          |
| <a href="#">Details</a> | 77 | 90 | hsa-miR-138-5p | <a href="#">SLC2A10</a>  | solute carrier family 2 member 10                                    |

|                         |    |    |                |                          |                                                            |
|-------------------------|----|----|----------------|--------------------------|------------------------------------------------------------|
| <a href="#">Details</a> | 78 | 90 | hsa-miR-138-5p | <a href="#">ADGRA2</a>   | adhesion G protein-coupled receptor A2                     |
| <a href="#">Details</a> | 79 | 90 | hsa-miR-138-5p | <a href="#">SOCS5</a>    | suppressor of cytokine signaling 5                         |
| <a href="#">Details</a> | 80 | 90 | hsa-miR-138-5p | <a href="#">KANK1</a>    | KN motif and ankyrin repeat domains 1                      |
| <a href="#">Details</a> | 81 | 90 | hsa-miR-138-5p | <a href="#">GTF3C3</a>   | general transcription factor IIIC subunit 3                |
| <a href="#">Details</a> | 82 | 90 | hsa-miR-138-5p | <a href="#">S100A2</a>   | S100 calcium binding protein A2                            |
| <a href="#">Details</a> | 83 | 90 | hsa-miR-138-5p | <a href="#">ARHGAP42</a> | Rho GTPase activating protein 42                           |
| <a href="#">Details</a> | 84 | 90 | hsa-miR-138-5p | <a href="#">MAN2A1</a>   | mannosidase alpha class 2A member 1                        |
| <a href="#">Details</a> | 85 | 90 | hsa-miR-138-5p | <a href="#">CASTOR2</a>  | cytosolic arginine sensor for mTORC1 subunit 2             |
| <a href="#">Details</a> | 86 | 89 | hsa-miR-138-5p | <a href="#">RIBC1</a>    | RIB43A domain with coiled-coils 1                          |
| <a href="#">Details</a> | 87 | 89 | hsa-miR-138-5p | <a href="#">CSRP2</a>    | cysteine and glycine rich protein 2                        |
| <a href="#">Details</a> | 88 | 89 | hsa-miR-138-5p | <a href="#">PP1P5K1</a>  | diphosphoinositol pentakisphosphate kinase 1               |
| <a href="#">Details</a> | 89 | 89 | hsa-miR-138-5p | <a href="#">DNAH12</a>   | dynein axonemal heavy chain 12                             |
| <a href="#">Details</a> | 90 | 89 | hsa-miR-138-5p | <a href="#">SIRT1</a>    | sirtuin 1                                                  |
| <a href="#">Details</a> | 91 | 89 | hsa-miR-138-5p | <a href="#">IMPAD1</a>   | inositol monophosphatase domain containing 1               |
| <a href="#">Details</a> | 92 | 89 | hsa-miR-138-5p | <a href="#">KDELR2</a>   | KDEL endoplasmic reticulum protein retention receptor 2    |
| <a href="#">Details</a> | 93 | 89 | hsa-miR-138-5p | <a href="#">FRMD5</a>    | FERM domain containing 5                                   |
| <a href="#">Details</a> | 94 | 89 | hsa-miR-138-5p | <a href="#">MRM3</a>     | mitochondrial rRNA methyltransferase 3                     |
| <a href="#">Details</a> | 95 | 89 | hsa-miR-138-5p | <a href="#">SENP1</a>    | SUMO specific peptidase 1                                  |
| <a href="#">Details</a> | 96 | 89 | hsa-miR-138-5p | <a href="#">PPARGC1A</a> | PPARG coactivator 1 alpha                                  |
| <a href="#">Details</a> | 97 | 89 | hsa-miR-138-5p | <a href="#">SLCO3A1</a>  | solute carrier organic anion transporter family member 3A1 |
| <a href="#">Details</a> | 98 | 89 | hsa-miR-138-5p | <a href="#">TRPS1</a>    | transcriptional repressor GATA binding 1                   |
| <a href="#">Details</a> | 99 | 89 | hsa-miR-138-5p | <a href="#">FOXP4</a>    | forkhead box P4                                            |

|                         |     |    |                |                          |                                                  |
|-------------------------|-----|----|----------------|--------------------------|--------------------------------------------------|
| <a href="#">Details</a> | 100 | 89 | hsa-miR-138-5p | <a href="#">MIEF2</a>    | mitochondrial elongation factor 2                |
| <a href="#">Details</a> | 101 | 88 | hsa-miR-138-5p | <a href="#">RCAN2</a>    | regulator of calcineurin 2                       |
| <a href="#">Details</a> | 102 | 88 | hsa-miR-138-5p | <a href="#">CNOT8</a>    | CCR4-NOT transcription complex subunit 8         |
| <a href="#">Details</a> | 103 | 88 | hsa-miR-138-5p | <a href="#">DMKN</a>     | dermokine                                        |
| <a href="#">Details</a> | 104 | 88 | hsa-miR-138-5p | <a href="#">SLC6A17</a>  | solute carrier family 6 member 17                |
| <a href="#">Details</a> | 105 | 88 | hsa-miR-138-5p | <a href="#">NINJ1</a>    | ninjurin 1                                       |
| <a href="#">Details</a> | 106 | 88 | hsa-miR-138-5p | <a href="#">NSFL1C</a>   | NSFL1 cofactor                                   |
| <a href="#">Details</a> | 107 | 88 | hsa-miR-138-5p | <a href="#">CLEC1A</a>   | C-type lectin domain family 1 member A           |
| <a href="#">Details</a> | 108 | 88 | hsa-miR-138-5p | <a href="#">ERI1</a>     | exoribonuclease 1                                |
| <a href="#">Details</a> | 109 | 88 | hsa-miR-138-5p | <a href="#">CALHM5</a>   | calcium homeostasis modulator family member 5    |
| <a href="#">Details</a> | 110 | 88 | hsa-miR-138-5p | <a href="#">KIAA1958</a> | KIAA1958                                         |
| <a href="#">Details</a> | 111 | 87 | hsa-miR-138-5p | <a href="#">NBEA</a>     | neurobeachin                                     |
| <a href="#">Details</a> | 112 | 87 | hsa-miR-138-5p | <a href="#">RHOC</a>     | ras homolog family member C                      |
| <a href="#">Details</a> | 113 | 87 | hsa-miR-138-5p | <a href="#">ZFP36L2</a>  | ZFP36 ring finger protein like 2                 |
| <a href="#">Details</a> | 114 | 87 | hsa-miR-138-5p | <a href="#">CLMP</a>     | CXADR like membrane protein                      |
| <a href="#">Details</a> | 115 | 87 | hsa-miR-138-5p | <a href="#">SH3GL2</a>   | SH3 domain containing GRB2 like 2, endophilin A1 |
| <a href="#">Details</a> | 116 | 87 | hsa-miR-138-5p | <a href="#">LYPLA1</a>   | lysophospholipase 1                              |
| <a href="#">Details</a> | 117 | 86 | hsa-miR-138-5p | <a href="#">ZNF148</a>   | zinc finger protein 148                          |
| <a href="#">Details</a> | 118 | 86 | hsa-miR-138-5p | <a href="#">STXBP5</a>   | syntaxin binding protein 5                       |
| <a href="#">Details</a> | 119 | 86 | hsa-miR-138-5p | <a href="#">SNCAIP</a>   | synuclein alpha interacting protein              |
| <a href="#">Details</a> | 120 | 86 | hsa-miR-138-5p | <a href="#">JOSD1</a>    | Josephin domain containing 1                     |
| <a href="#">Details</a> | 121 | 86 | hsa-miR-138-5p | <a href="#">SYT13</a>    | synaptotagmin 13                                 |

|                         |     |    |                |                          |                                                                |
|-------------------------|-----|----|----------------|--------------------------|----------------------------------------------------------------|
| <a href="#">Details</a> | 122 | 86 | hsa-miR-138-5p | <a href="#">CLNS1A</a>   | chloride nucleotide-sensitive channel 1A                       |
| <a href="#">Details</a> | 123 | 86 | hsa-miR-138-5p | <a href="#">CORIN</a>    | corin, serine peptidase                                        |
| <a href="#">Details</a> | 124 | 86 | hsa-miR-138-5p | <a href="#">MAST4</a>    | microtubule associated serine/threonine kinase family member 4 |
| <a href="#">Details</a> | 125 | 86 | hsa-miR-138-5p | <a href="#">ZNF275</a>   | zinc finger protein 275                                        |
| <a href="#">Details</a> | 126 | 86 | hsa-miR-138-5p | <a href="#">PSD2</a>     | pleckstrin and Sec7 domain containing 2                        |
| <a href="#">Details</a> | 127 | 86 | hsa-miR-138-5p | <a href="#">TMEM198</a>  | transmembrane protein 198                                      |
| <a href="#">Details</a> | 128 | 86 | hsa-miR-138-5p | <a href="#">UBP1</a>     | upstream binding protein 1                                     |
| <a href="#">Details</a> | 129 | 86 | hsa-miR-138-5p | <a href="#">EPHA8</a>    | EPH receptor A8                                                |
| <a href="#">Details</a> | 130 | 86 | hsa-miR-138-5p | <a href="#">RASL12</a>   | RAS like family 12                                             |
| <a href="#">Details</a> | 131 | 86 | hsa-miR-138-5p | <a href="#">PWWP2A</a>   | PWWP domain containing 2A                                      |
| <a href="#">Details</a> | 132 | 86 | hsa-miR-138-5p | <a href="#">CENPN</a>    | centromere protein N                                           |
| <a href="#">Details</a> | 133 | 86 | hsa-miR-138-5p | <a href="#">THRAP3</a>   | thyroid hormone receptor associated protein 3                  |
| <a href="#">Details</a> | 134 | 86 | hsa-miR-138-5p | <a href="#">LIMCH1</a>   | LIM and calponin homology domains 1                            |
| <a href="#">Details</a> | 135 | 85 | hsa-miR-138-5p | <a href="#">SORBS2</a>   | sorbin and SH3 domain containing 2                             |
| <a href="#">Details</a> | 136 | 85 | hsa-miR-138-5p | <a href="#">GNAI2</a>    | G protein subunit alpha i2                                     |
| <a href="#">Details</a> | 137 | 85 | hsa-miR-138-5p | <a href="#">KIAA0930</a> | KIAA0930                                                       |
| <a href="#">Details</a> | 138 | 85 | hsa-miR-138-5p | <a href="#">PIP4K2C</a>  | phosphatidylinositol-5-phosphate 4-kinase type 2 gamma         |
| <a href="#">Details</a> | 139 | 85 | hsa-miR-138-5p | <a href="#">RPRD1B</a>   | regulation of nuclear pre-mRNA domain containing 1B            |
| <a href="#">Details</a> | 140 | 85 | hsa-miR-138-5p | <a href="#">RPS6KA1</a>  | ribosomal protein S6 kinase A1                                 |
| <a href="#">Details</a> | 141 | 85 | hsa-miR-138-5p | <a href="#">SCN8A</a>    | sodium voltage-gated channel alpha subunit 8                   |
| <a href="#">Details</a> | 142 | 85 | hsa-miR-138-5p | <a href="#">PDE7B</a>    | phosphodiesterase 7B                                           |
| <a href="#">Details</a> | 143 | 84 | hsa-miR-138-5p | <a href="#">ZSCAN22</a>  | zinc finger and SCAN domain containing 22                      |

|                         |     |    |                |                         |                                                           |
|-------------------------|-----|----|----------------|-------------------------|-----------------------------------------------------------|
| <a href="#">Details</a> | 144 | 84 | hsa-miR-138-5p | <a href="#">FAM169A</a> | family with sequence similarity 169 member A              |
| <a href="#">Details</a> | 145 | 84 | hsa-miR-138-5p | <a href="#">KDM5A</a>   | lysine demethylase 5A                                     |
| <a href="#">Details</a> | 146 | 84 | hsa-miR-138-5p | <a href="#">LPAR4</a>   | lysophosphatidic acid receptor 4                          |
| <a href="#">Details</a> | 147 | 84 | hsa-miR-138-5p | <a href="#">RAD51D</a>  | RAD51 paralog D                                           |
| <a href="#">Details</a> | 148 | 84 | hsa-miR-138-5p | <a href="#">NEUROD1</a> | neuronal differentiation 1                                |
| <a href="#">Details</a> | 149 | 84 | hsa-miR-138-5p | <a href="#">CA3</a>     | carbonic anhydrase 3                                      |
| <a href="#">Details</a> | 150 | 84 | hsa-miR-138-5p | <a href="#">PTPN4</a>   | protein tyrosine phosphatase, non-receptor type 4         |
| <a href="#">Details</a> | 151 | 84 | hsa-miR-138-5p | <a href="#">CCDC85C</a> | coiled-coil domain containing 85C                         |
| <a href="#">Details</a> | 152 | 84 | hsa-miR-138-5p | <a href="#">NFIB</a>    | nuclear factor I B                                        |
| <a href="#">Details</a> | 153 | 84 | hsa-miR-138-5p | <a href="#">APPBP2</a>  | amyloid beta precursor protein binding protein 2          |
| <a href="#">Details</a> | 154 | 84 | hsa-miR-138-5p | <a href="#">SLC6A8</a>  | solute carrier family 6 member 8                          |
| <a href="#">Details</a> | 155 | 83 | hsa-miR-138-5p | <a href="#">AGO4</a>    | argonaute RISC catalytic component 4                      |
| <a href="#">Details</a> | 156 | 83 | hsa-miR-138-5p | <a href="#">ARRDC3</a>  | arrestin domain containing 3                              |
| <a href="#">Details</a> | 157 | 83 | hsa-miR-138-5p | <a href="#">SEH1L</a>   | SEH1 like nucleoporin                                     |
| <a href="#">Details</a> | 158 | 83 | hsa-miR-138-5p | <a href="#">TLL12</a>   | tubulin tyrosine ligase like 12                           |
| <a href="#">Details</a> | 159 | 83 | hsa-miR-138-5p | <a href="#">ZFAT</a>    | zinc finger and AT-hook domain containing                 |
| <a href="#">Details</a> | 160 | 83 | hsa-miR-138-5p | <a href="#">NKAIN1</a>  | sodium/potassium transporting ATPase interacting 1        |
| <a href="#">Details</a> | 161 | 83 | hsa-miR-138-5p | <a href="#">TEAD1</a>   | TEA domain transcription factor 1                         |
| <a href="#">Details</a> | 162 | 83 | hsa-miR-138-5p | <a href="#">LMAN1</a>   | lectin, mannose binding 1                                 |
| <a href="#">Details</a> | 163 | 83 | hsa-miR-138-5p | <a href="#">LIN9</a>    | lin-9 DREAM MuvB core complex component                   |
| <a href="#">Details</a> | 164 | 83 | hsa-miR-138-5p | <a href="#">EZH2</a>    | enhancer of zeste 2 polycomb repressive complex 2 subunit |
| <a href="#">Details</a> | 165 | 83 | hsa-miR-138-5p | <a href="#">TULP4</a>   | tubby like protein 4                                      |



|                         |     |    |                |                         |                                                        |
|-------------------------|-----|----|----------------|-------------------------|--------------------------------------------------------|
| <a href="#">Details</a> | 166 | 83 | hsa-miR-138-5p | <a href="#">SOBP</a>    | sine oculis binding protein homolog                    |
| <a href="#">Details</a> | 167 | 83 | hsa-miR-138-5p | <a href="#">THAP11</a>  | THAP domain containing 11                              |
| <a href="#">Details</a> | 168 | 83 | hsa-miR-138-5p | <a href="#">ROCK2</a>   | Rho associated coiled-coil containing protein kinase 2 |
| <a href="#">Details</a> | 169 | 83 | hsa-miR-138-5p | <a href="#">RASSF8</a>  | Ras association domain family member 8                 |
| <a href="#">Details</a> | 170 | 83 | hsa-miR-138-5p | <a href="#">PTK2</a>    | protein tyrosine kinase 2                              |
| <a href="#">Details</a> | 171 | 83 | hsa-miR-138-5p | <a href="#">JAZF1</a>   | JAZF zinc finger 1                                     |
| <a href="#">Details</a> | 172 | 83 | hsa-miR-138-5p | <a href="#">SEZ6L2</a>  | seizure related 6 homolog like 2                       |
| <a href="#">Details</a> | 173 | 83 | hsa-miR-138-5p | <a href="#">ACVR2B</a>  | activin A receptor type 2B                             |
| <a href="#">Details</a> | 174 | 83 | hsa-miR-138-5p | <a href="#">SERTAD4</a> | SERTA domain containing 4                              |
| <a href="#">Details</a> | 175 | 83 | hsa-miR-138-5p | <a href="#">KLHL18</a>  | kelch like family member 18                            |
| <a href="#">Details</a> | 176 | 82 | hsa-miR-138-5p | <a href="#">VEZF1</a>   | vascular endothelial zinc finger 1                     |
| <a href="#">Details</a> | 177 | 82 | hsa-miR-138-5p | <a href="#">ADAL</a>    | adenosine deaminase like                               |
| <a href="#">Details</a> | 178 | 82 | hsa-miR-138-5p | <a href="#">C6orf47</a> | chromosome 6 open reading frame 47                     |
| <a href="#">Details</a> | 179 | 82 | hsa-miR-138-5p | <a href="#">AHCYL2</a>  | adenosylhomocysteinase like 2                          |
| <a href="#">Details</a> | 180 | 82 | hsa-miR-138-5p | <a href="#">NKAPD1</a>  | NKAP domain containing 1                               |
| <a href="#">Details</a> | 181 | 82 | hsa-miR-138-5p | <a href="#">HIF1AN</a>  | hypoxia inducible factor 1 subunit alpha inhibitor     |
| <a href="#">Details</a> | 182 | 82 | hsa-miR-138-5p | <a href="#">G6PD</a>    | glucose-6-phosphate dehydrogenase                      |
| <a href="#">Details</a> | 183 | 82 | hsa-miR-138-5p | <a href="#">FAM83D</a>  | family with sequence similarity 83 member D            |
| <a href="#">Details</a> | 184 | 82 | hsa-miR-138-5p | <a href="#">CDK6</a>    | cyclin dependent kinase 6                              |
| <a href="#">Details</a> | 185 | 82 | hsa-miR-138-5p | <a href="#">VPS26A</a>  | VPS26, retromer complex component A                    |
| <a href="#">Details</a> | 186 | 82 | hsa-miR-138-5p | <a href="#">ACP7</a>    | acid phosphatase 7, tartrate resistant (putative)      |
| <a href="#">Details</a> | 187 | 82 | hsa-miR-138-5p | <a href="#">KMT2C</a>   | lysine methyltransferase 2C                            |

|                         |     |    |                |                          |                                                           |
|-------------------------|-----|----|----------------|--------------------------|-----------------------------------------------------------|
| <a href="#">Details</a> | 188 | 82 | hsa-miR-138-5p | <a href="#">PAPPA</a>    | pappalysin 1                                              |
| <a href="#">Details</a> | 189 | 81 | hsa-miR-138-5p | <a href="#">PACSLN2</a>  | protein kinase C and casein kinase substrate in neurons 2 |
| <a href="#">Details</a> | 190 | 81 | hsa-miR-138-5p | <a href="#">PRPF40A</a>  | pre-mRNA processing factor 40 homolog A                   |
| <a href="#">Details</a> | 191 | 81 | hsa-miR-138-5p | <a href="#">H3F3B</a>    | H3 histone family member 3B                               |
| <a href="#">Details</a> | 192 | 81 | hsa-miR-138-5p | <a href="#">CNOT9</a>    | CCR4-NOT transcription complex subunit 9                  |
| <a href="#">Details</a> | 193 | 81 | hsa-miR-138-5p | <a href="#">CREB1</a>    | cAMP responsive element binding protein 1                 |
| <a href="#">Details</a> | 194 | 81 | hsa-miR-138-5p | <a href="#">FAM210B</a>  | family with sequence similarity 210 member B              |
| <a href="#">Details</a> | 195 | 81 | hsa-miR-138-5p | <a href="#">SCRN1</a>    | secernin 1                                                |
| <a href="#">Details</a> | 196 | 81 | hsa-miR-138-5p | <a href="#">UHRF1BP1</a> | UHRF1 binding protein 1                                   |
| <a href="#">Details</a> | 197 | 81 | hsa-miR-138-5p | <a href="#">TENT4B</a>   | terminal nucleotidyltransferase 4B                        |
| <a href="#">Details</a> | 198 | 81 | hsa-miR-138-5p | <a href="#">ARPIN</a>    | actin related protein 2/3 complex inhibitor               |
| <a href="#">Details</a> | 199 | 81 | hsa-miR-138-5p | <a href="#">NRM</a>      | nurim                                                     |
| <a href="#">Details</a> | 200 | 81 | hsa-miR-138-5p | <a href="#">BCL11A</a>   | BCL11A, BAF complex component                             |
| <a href="#">Details</a> | 201 | 80 | hsa-miR-138-5p | <a href="#">MZF1</a>     | myeloid zinc finger 1                                     |
| <a href="#">Details</a> | 202 | 80 | hsa-miR-138-5p | <a href="#">HECTD2</a>   | HECT domain E3 ubiquitin protein ligase 2                 |
| <a href="#">Details</a> | 203 | 80 | hsa-miR-138-5p | <a href="#">CLOCK</a>    | clock circadian regulator                                 |
| <a href="#">Details</a> | 204 | 80 | hsa-miR-138-5p | <a href="#">VSTM4</a>    | V-set and transmembrane domain containing 4               |
| <a href="#">Details</a> | 205 | 80 | hsa-miR-138-5p | <a href="#">RNF38</a>    | ring finger protein 38                                    |
| <a href="#">Details</a> | 206 | 80 | hsa-miR-138-5p | <a href="#">DCUN1D4</a>  | defective in cullin neddylation 1 domain containing 4     |
| <a href="#">Details</a> | 207 | 80 | hsa-miR-138-5p | <a href="#">CD34</a>     | CD34 molecule                                             |
| <a href="#">Details</a> | 208 | 80 | hsa-miR-138-5p | <a href="#">JMJD8</a>    | jumonji domain containing 8                               |
| <a href="#">Details</a> | 209 | 80 | hsa-miR-138-5p | <a href="#">TRAM1</a>    | translocation associated membrane protein 1               |

|                         |     |    |                |                          |                                                               |
|-------------------------|-----|----|----------------|--------------------------|---------------------------------------------------------------|
| <a href="#">Details</a> | 210 | 80 | hsa-miR-138-5p | <a href="#">MXD1</a>     | MAX dimerization protein 1                                    |
| <a href="#">Details</a> | 211 | 80 | hsa-miR-138-5p | <a href="#">SLC41A1</a>  | solute carrier family 41 member 1                             |
| <a href="#">Details</a> | 212 | 80 | hsa-miR-138-5p | <a href="#">C12orf65</a> | chromosome 12 open reading frame 65                           |
| <a href="#">Details</a> | 213 | 80 | hsa-miR-138-5p | <a href="#">ZER1</a>     | zyg-11 related cell cycle regulator                           |
| <a href="#">Details</a> | 214 | 80 | hsa-miR-138-5p | <a href="#">KIF26A</a>   | kinesin family member 26A                                     |
| <a href="#">Details</a> | 215 | 80 | hsa-miR-138-5p | <a href="#">IGLON5</a>   | IgLON family member 5                                         |
| <a href="#">Details</a> | 216 | 79 | hsa-miR-138-5p | <a href="#">ELOF1</a>    | elongation factor 1 homolog                                   |
| <a href="#">Details</a> | 217 | 79 | hsa-miR-138-5p | <a href="#">SNAP25</a>   | synaptosome associated protein 25                             |
| <a href="#">Details</a> | 218 | 79 | hsa-miR-138-5p | <a href="#">XPR1</a>     | xenotropic and polytropic retrovirus receptor 1               |
| <a href="#">Details</a> | 219 | 79 | hsa-miR-138-5p | <a href="#">ARFGEF2</a>  | ADP ribosylation factor guanine nucleotide exchange factor 2  |
| <a href="#">Details</a> | 220 | 79 | hsa-miR-138-5p | <a href="#">KCNMA1</a>   | potassium calcium-activated channel subfamily M alpha 1       |
| <a href="#">Details</a> | 221 | 79 | hsa-miR-138-5p | <a href="#">MIER3</a>    | MIER family member 3                                          |
| <a href="#">Details</a> | 222 | 79 | hsa-miR-138-5p | <a href="#">CSF3R</a>    | colony stimulating factor 3 receptor                          |
| <a href="#">Details</a> | 223 | 79 | hsa-miR-138-5p | <a href="#">MCU</a>      | mitochondrial calcium uniporter                               |
| <a href="#">Details</a> | 224 | 79 | hsa-miR-138-5p | <a href="#">MBTPS2</a>   | membrane bound transcription factor peptidase, site 2         |
| <a href="#">Details</a> | 225 | 79 | hsa-miR-138-5p | <a href="#">MAML1</a>    | mastermind like transcriptional coactivator 1                 |
| <a href="#">Details</a> | 226 | 79 | hsa-miR-138-5p | <a href="#">TNFSF4</a>   | TNF superfamily member 4                                      |
| <a href="#">Details</a> | 227 | 79 | hsa-miR-138-5p | <a href="#">ZNF444</a>   | zinc finger protein 444                                       |
| <a href="#">Details</a> | 228 | 79 | hsa-miR-138-5p | <a href="#">CHD6</a>     | chromodomain helicase DNA binding protein 6                   |
| <a href="#">Details</a> | 229 | 79 | hsa-miR-138-5p | <a href="#">EIF4EBP1</a> | eukaryotic translation initiation factor 4E binding protein 1 |
| <a href="#">Details</a> | 230 | 79 | hsa-miR-138-5p | <a href="#">EYA1</a>     | EYA transcriptional coactivator and phosphatase 1             |
| <a href="#">Details</a> | 231 | 78 | hsa-miR-138-5p | <a href="#">SLC35E2A</a> | solute carrier family 35 member E2A                           |

|                         |     |    |                |                          |                                                             |
|-------------------------|-----|----|----------------|--------------------------|-------------------------------------------------------------|
| <a href="#">Details</a> | 232 | 78 | hsa-miR-138-5p | <a href="#">SLX4</a>     | SLX4 structure-specific endonuclease subunit                |
| <a href="#">Details</a> | 233 | 78 | hsa-miR-138-5p | <a href="#">DVL2</a>     | dishevelled segment polarity protein 2                      |
| <a href="#">Details</a> | 234 | 78 | hsa-miR-138-5p | <a href="#">ARHGEF3</a>  | Rho guanine nucleotide exchange factor 3                    |
| <a href="#">Details</a> | 235 | 78 | hsa-miR-138-5p | <a href="#">GPATCH2L</a> | G-patch domain containing 2 like                            |
| <a href="#">Details</a> | 236 | 78 | hsa-miR-138-5p | <a href="#">DUSP16</a>   | dual specificity phosphatase 16                             |
| <a href="#">Details</a> | 237 | 78 | hsa-miR-138-5p | <a href="#">TTC14</a>    | tetratricopeptide repeat domain 14                          |
| <a href="#">Details</a> | 238 | 78 | hsa-miR-138-5p | <a href="#">TSR1</a>     | TSR1, ribosome maturation factor                            |
| <a href="#">Details</a> | 239 | 78 | hsa-miR-138-5p | <a href="#">C11orf21</a> | chromosome 11 open reading frame 21                         |
| <a href="#">Details</a> | 240 | 78 | hsa-miR-138-5p | <a href="#">PHF21A</a>   | PHD finger protein 21A                                      |
| <a href="#">Details</a> | 241 | 78 | hsa-miR-138-5p | <a href="#">ZNF704</a>   | zinc finger protein 704                                     |
| <a href="#">Details</a> | 242 | 77 | hsa-miR-138-5p | <a href="#">GATAD2A</a>  | GATA zinc finger domain containing 2A                       |
| <a href="#">Details</a> | 243 | 77 | hsa-miR-138-5p | <a href="#">SFSWAP</a>   | splicing factor SWAP                                        |
| <a href="#">Details</a> | 244 | 77 | hsa-miR-138-5p | <a href="#">COG7</a>     | component of oligomeric golgi complex 7                     |
| <a href="#">Details</a> | 245 | 77 | hsa-miR-138-5p | <a href="#">ATCAY</a>    | ATCAY, caytaxin                                             |
| <a href="#">Details</a> | 246 | 77 | hsa-miR-138-5p | <a href="#">ANKRD54</a>  | ankyrin repeat domain 54                                    |
| <a href="#">Details</a> | 247 | 77 | hsa-miR-138-5p | <a href="#">PTPN11</a>   | protein tyrosine phosphatase, non-receptor type 11          |
| <a href="#">Details</a> | 248 | 77 | hsa-miR-138-5p | <a href="#">LGALS12</a>  | galectin 12                                                 |
| <a href="#">Details</a> | 249 | 77 | hsa-miR-138-5p | <a href="#">ATG5</a>     | autophagy related 5                                         |
| <a href="#">Details</a> | 250 | 77 | hsa-miR-138-5p | <a href="#">PLLP</a>     | plasmolipin                                                 |
| <a href="#">Details</a> | 251 | 77 | hsa-miR-138-5p | <a href="#">ARL6IP5</a>  | ADP ribosylation factor like GTPase 6 interacting protein 5 |
| <a href="#">Details</a> | 252 | 76 | hsa-miR-138-5p | <a href="#">SMAP2</a>    | small ArfGAP2                                               |
| <a href="#">Details</a> | 253 | 76 | hsa-miR-138-5p | <a href="#">VPS37A</a>   | VPS37A, ESCRT-I subunit                                     |

|                         |     |    |                |                          |                                                  |
|-------------------------|-----|----|----------------|--------------------------|--------------------------------------------------|
| <a href="#">Details</a> | 254 | 76 | hsa-miR-138-5p | <a href="#">GAS7</a>     | growth arrest specific 7                         |
| <a href="#">Details</a> | 255 | 76 | hsa-miR-138-5p | <a href="#">ZNF518A</a>  | zinc finger protein 518A                         |
| <a href="#">Details</a> | 256 | 76 | hsa-miR-138-5p | <a href="#">ARMC7</a>    | armadillo repeat containing 7                    |
| <a href="#">Details</a> | 257 | 76 | hsa-miR-138-5p | <a href="#">EFNB3</a>    | ephrin B3                                        |
| <a href="#">Details</a> | 258 | 76 | hsa-miR-138-5p | <a href="#">FAAH2</a>    | fatty acid amide hydrolase 2                     |
| <a href="#">Details</a> | 259 | 76 | hsa-miR-138-5p | <a href="#">SIM2</a>     | SIM bHLH transcription factor 2                  |
| <a href="#">Details</a> | 260 | 76 | hsa-miR-138-5p | <a href="#">LENG8</a>    | leukocyte receptor cluster member 8              |
| <a href="#">Details</a> | 261 | 76 | hsa-miR-138-5p | <a href="#">RHBDD1</a>   | rhomboid domain containing 1                     |
| <a href="#">Details</a> | 262 | 76 | hsa-miR-138-5p | <a href="#">STAG1</a>    | stromal antigen 1                                |
| <a href="#">Details</a> | 263 | 76 | hsa-miR-138-5p | <a href="#">GPHN</a>     | gephyrin                                         |
| <a href="#">Details</a> | 264 | 76 | hsa-miR-138-5p | <a href="#">PCGF3</a>    | polycomb group ring finger 3                     |
| <a href="#">Details</a> | 265 | 76 | hsa-miR-138-5p | <a href="#">ZNF135</a>   | zinc finger protein 135                          |
| <a href="#">Details</a> | 266 | 76 | hsa-miR-138-5p | <a href="#">ATP8A1</a>   | ATPase phospholipid transporting 8A1             |
| <a href="#">Details</a> | 267 | 76 | hsa-miR-138-5p | <a href="#">KLHDC10</a>  | kelch domain containing 10                       |
| <a href="#">Details</a> | 268 | 75 | hsa-miR-138-5p | <a href="#">TMEM178B</a> | transmembrane protein 178B                       |
| <a href="#">Details</a> | 269 | 75 | hsa-miR-138-5p | <a href="#">SMIM13</a>   | small integral membrane protein 13               |
| <a href="#">Details</a> | 270 | 75 | hsa-miR-138-5p | <a href="#">ZCCHC14</a>  | zinc finger CCHC-type containing 14              |
| <a href="#">Details</a> | 271 | 75 | hsa-miR-138-5p | <a href="#">CASP7</a>    | caspase 7                                        |
| <a href="#">Details</a> | 272 | 75 | hsa-miR-138-5p | <a href="#">HSDL2</a>    | hydroxysteroid dehydrogenase like 2              |
| <a href="#">Details</a> | 273 | 75 | hsa-miR-138-5p | <a href="#">CDR2L</a>    | cerebellar degeneration related protein 2 like   |
| <a href="#">Details</a> | 274 | 75 | hsa-miR-138-5p | <a href="#">CREB3L2</a>  | cAMP responsive element binding protein 3 like 2 |
| <a href="#">Details</a> | 275 | 75 | hsa-miR-138-5p | <a href="#">FAM78B</a>   | family with sequence similarity 78 member B      |

|                         |     |    |                |                          |                                                      |
|-------------------------|-----|----|----------------|--------------------------|------------------------------------------------------|
| <a href="#">Details</a> | 276 | 75 | hsa-miR-138-5p | <a href="#">WFDC10A</a>  | WAP four-disulfide core domain 10A                   |
| <a href="#">Details</a> | 277 | 75 | hsa-miR-138-5p | <a href="#">RTL6</a>     | retrotransposon Gag like 6                           |
| <a href="#">Details</a> | 278 | 75 | hsa-miR-138-5p | <a href="#">SAE1</a>     | SUMO1 activating enzyme subunit 1                    |
| <a href="#">Details</a> | 279 | 75 | hsa-miR-138-5p | <a href="#">PEG10</a>    | paternally expressed 10                              |
| <a href="#">Details</a> | 280 | 75 | hsa-miR-138-5p | <a href="#">YPEL4</a>    | yippee like 4                                        |
| <a href="#">Details</a> | 281 | 75 | hsa-miR-138-5p | <a href="#">RIMS3</a>    | regulating synaptic membrane exocytosis 3            |
| <a href="#">Details</a> | 282 | 75 | hsa-miR-138-5p | <a href="#">DHDDS</a>    | dehydrodolichyl diphosphate synthase subunit         |
| <a href="#">Details</a> | 283 | 74 | hsa-miR-138-5p | <a href="#">DDX11</a>    | DEAD/H-box helicase 11                               |
| <a href="#">Details</a> | 284 | 74 | hsa-miR-138-5p | <a href="#">ZNF827</a>   | zinc finger protein 827                              |
| <a href="#">Details</a> | 285 | 74 | hsa-miR-138-5p | <a href="#">SLC25A10</a> | solute carrier family 25 member 10                   |
| <a href="#">Details</a> | 286 | 74 | hsa-miR-138-5p | <a href="#">SRRM4</a>    | serine/arginine repetitive matrix 4                  |
| <a href="#">Details</a> | 287 | 74 | hsa-miR-138-5p | <a href="#">RIMS4</a>    | regulating synaptic membrane exocytosis 4            |
| <a href="#">Details</a> | 288 | 74 | hsa-miR-138-5p | <a href="#">EFR3A</a>    | EFR3 homolog A                                       |
| <a href="#">Details</a> | 289 | 74 | hsa-miR-138-5p | <a href="#">SLC17A7</a>  | solute carrier family 17 member 7                    |
| <a href="#">Details</a> | 290 | 74 | hsa-miR-138-5p | <a href="#">ZMIZ1</a>    | zinc finger MIZ-type containing 1                    |
| <a href="#">Details</a> | 291 | 74 | hsa-miR-138-5p | <a href="#">GALNT10</a>  | polypeptide N-acetylgalactosaminyltransferase 10     |
| <a href="#">Details</a> | 292 | 74 | hsa-miR-138-5p | <a href="#">ADCY1</a>    | adenylate cyclase 1                                  |
| <a href="#">Details</a> | 293 | 74 | hsa-miR-138-5p | <a href="#">KDM5C</a>    | lysine demethylase 5C                                |
| <a href="#">Details</a> | 294 | 74 | hsa-miR-138-5p | <a href="#">SOX4</a>     | SRY-box 4                                            |
| <a href="#">Details</a> | 295 | 74 | hsa-miR-138-5p | <a href="#">HIF1A</a>    | hypoxia inducible factor 1 subunit alpha             |
| <a href="#">Details</a> | 296 | 74 | hsa-miR-138-5p | <a href="#">TTC28</a>    | tetratricopeptide repeat domain 28                   |
| <a href="#">Details</a> | 297 | 74 | hsa-miR-138-5p | <a href="#">EIF3J</a>    | eukaryotic translation initiation factor 3 subunit J |

|                         |     |    |                |                          |                                                         |
|-------------------------|-----|----|----------------|--------------------------|---------------------------------------------------------|
| <a href="#">Details</a> | 298 | 74 | hsa-miR-138-5p | <a href="#">OPRM1</a>    | opioid receptor mu 1                                    |
| <a href="#">Details</a> | 299 | 73 | hsa-miR-138-5p | <a href="#">MAP3K11</a>  | mitogen-activated protein kinase kinase kinase 11       |
| <a href="#">Details</a> | 300 | 73 | hsa-miR-138-5p | <a href="#">QPRT</a>     | quinolinate phosphoribosyltransferase                   |
| <a href="#">Details</a> | 301 | 73 | hsa-miR-138-5p | <a href="#">LYPD5</a>    | LY6/PLAUR domain containing 5                           |
| <a href="#">Details</a> | 302 | 73 | hsa-miR-138-5p | <a href="#">RALGPS1</a>  | Ral GEF with PH domain and SH3 binding motif 1          |
| <a href="#">Details</a> | 303 | 73 | hsa-miR-138-5p | <a href="#">ST3GAL3</a>  | ST3 beta-galactoside alpha-2,3-sialyltransferase 3      |
| <a href="#">Details</a> | 304 | 73 | hsa-miR-138-5p | <a href="#">CASP3</a>    | caspase 3                                               |
| <a href="#">Details</a> | 305 | 73 | hsa-miR-138-5p | <a href="#">GPR158</a>   | G protein-coupled receptor 158                          |
| <a href="#">Details</a> | 306 | 73 | hsa-miR-138-5p | <a href="#">ZNF780B</a>  | zinc finger protein 780B                                |
| <a href="#">Details</a> | 307 | 73 | hsa-miR-138-5p | <a href="#">DUOXA1</a>   | dual oxidase maturation factor 1                        |
| <a href="#">Details</a> | 308 | 73 | hsa-miR-138-5p | <a href="#">WWC1</a>     | WW and C2 domain containing 1                           |
| <a href="#">Details</a> | 309 | 73 | hsa-miR-138-5p | <a href="#">TET2</a>     | tet methylcytosine dioxygenase 2                        |
| <a href="#">Details</a> | 310 | 73 | hsa-miR-138-5p | <a href="#">PAN3</a>     | poly(A) specific ribonuclease subunit PAN3              |
| <a href="#">Details</a> | 311 | 73 | hsa-miR-138-5p | <a href="#">RARRES1</a>  | retinoic acid receptor responder 1                      |
| <a href="#">Details</a> | 312 | 73 | hsa-miR-138-5p | <a href="#">HIP1R</a>    | huntingtin interacting protein 1 related                |
| <a href="#">Details</a> | 313 | 73 | hsa-miR-138-5p | <a href="#">KCNK15</a>   | potassium two pore domain channel subfamily K member 15 |
| <a href="#">Details</a> | 314 | 73 | hsa-miR-138-5p | <a href="#">RP2</a>      | RP2, ARL3 GTPase activating protein                     |
| <a href="#">Details</a> | 315 | 72 | hsa-miR-138-5p | <a href="#">WDR4</a>     | WD repeat domain 4                                      |
| <a href="#">Details</a> | 316 | 72 | hsa-miR-138-5p | <a href="#">ZNF609</a>   | zinc finger protein 609                                 |
| <a href="#">Details</a> | 317 | 72 | hsa-miR-138-5p | <a href="#">UIMC1</a>    | ubiquitin interaction motif containing 1                |
| <a href="#">Details</a> | 318 | 72 | hsa-miR-138-5p | <a href="#">NCBP3</a>    | nuclear cap binding subunit 3                           |
| <a href="#">Details</a> | 319 | 72 | hsa-miR-138-5p | <a href="#">TMEM167A</a> | transmembrane protein 167A                              |

|                         |     |    |                |                         |                                                                              |
|-------------------------|-----|----|----------------|-------------------------|------------------------------------------------------------------------------|
| <a href="#">Details</a> | 320 | 72 | hsa-miR-138-5p | <a href="#">SEPT11</a>  | septin 11                                                                    |
| <a href="#">Details</a> | 321 | 72 | hsa-miR-138-5p | <a href="#">PPM1L</a>   | protein phosphatase, Mg <sup>2+</sup> /Mn <sup>2+</sup> dependent 1L         |
| <a href="#">Details</a> | 322 | 72 | hsa-miR-138-5p | <a href="#">GPR85</a>   | G protein-coupled receptor 85                                                |
| <a href="#">Details</a> | 323 | 72 | hsa-miR-138-5p | <a href="#">KAT6A</a>   | lysine acetyltransferase 6A                                                  |
| <a href="#">Details</a> | 324 | 72 | hsa-miR-138-5p | <a href="#">DENND6A</a> | DENN domain containing 6A                                                    |
| <a href="#">Details</a> | 325 | 72 | hsa-miR-138-5p | <a href="#">NLRP2B</a>  | NLR family pyrin domain containing 2B                                        |
| <a href="#">Details</a> | 326 | 72 | hsa-miR-138-5p | <a href="#">EBPL</a>    | EBP like                                                                     |
| <a href="#">Details</a> | 327 | 72 | hsa-miR-138-5p | <a href="#">RXFP3</a>   | relaxin family peptide receptor 3                                            |
| <a href="#">Details</a> | 328 | 72 | hsa-miR-138-5p | <a href="#">MLXIP</a>   | MLX interacting protein                                                      |
| <a href="#">Details</a> | 329 | 72 | hsa-miR-138-5p | <a href="#">RHBDL3</a>  | rhomboid like 3                                                              |
| <a href="#">Details</a> | 330 | 72 | hsa-miR-138-5p | <a href="#">ASAH2B</a>  | N-acylsphingosine amidohydrolase 2B                                          |
| <a href="#">Details</a> | 331 | 72 | hsa-miR-138-5p | <a href="#">IGF2BP2</a> | insulin like growth factor 2 mRNA binding protein 2                          |
| <a href="#">Details</a> | 332 | 71 | hsa-miR-138-5p | <a href="#">TCF3</a>    | transcription factor 3                                                       |
| <a href="#">Details</a> | 333 | 71 | hsa-miR-138-5p | <a href="#">PDLIM1</a>  | PDZ and LIM domain 1                                                         |
| <a href="#">Details</a> | 334 | 71 | hsa-miR-138-5p | <a href="#">YIPF5</a>   | Yip1 domain family member 5                                                  |
| <a href="#">Details</a> | 335 | 71 | hsa-miR-138-5p | <a href="#">TRIM67</a>  | tripartite motif containing 67                                               |
| <a href="#">Details</a> | 336 | 71 | hsa-miR-138-5p | <a href="#">ZNF282</a>  | zinc finger protein 282                                                      |
| <a href="#">Details</a> | 337 | 71 | hsa-miR-138-5p | <a href="#">FHIT</a>    | fragile histidine triad                                                      |
| <a href="#">Details</a> | 338 | 71 | hsa-miR-138-5p | <a href="#">PCMTD1</a>  | protein-L-isoaspartate (D-aspartate) O-methyltransferase domain containing 1 |
| <a href="#">Details</a> | 339 | 71 | hsa-miR-138-5p | <a href="#">SLC50A1</a> | solute carrier family 50 member 1                                            |
| <a href="#">Details</a> | 340 | 71 | hsa-miR-138-5p | <a href="#">EN2</a>     | engrailed homeobox 2                                                         |



|                         |     |    |                |                          |                                                            |
|-------------------------|-----|----|----------------|--------------------------|------------------------------------------------------------|
| <a href="#">Details</a> | 341 | 71 | hsa-miR-138-5p | <a href="#">DAAM2</a>    | dishevelled associated activator of morphogenesis 2        |
| <a href="#">Details</a> | 342 | 71 | hsa-miR-138-5p | <a href="#">FANCE</a>    | FA complementation group E                                 |
| <a href="#">Details</a> | 343 | 71 | hsa-miR-138-5p | <a href="#">ZMYND11</a>  | zinc finger MYND-type containing 11                        |
| <a href="#">Details</a> | 344 | 71 | hsa-miR-138-5p | <a href="#">TRAF5</a>    | TNF receptor associated factor 5                           |
| <a href="#">Details</a> | 345 | 71 | hsa-miR-138-5p | <a href="#">MYO15B</a>   | myosin XVB                                                 |
| <a href="#">Details</a> | 346 | 70 | hsa-miR-138-5p | <a href="#">VSIR</a>     | V-set immunoregulatory receptor                            |
| <a href="#">Details</a> | 347 | 70 | hsa-miR-138-5p | <a href="#">ZNF37A</a>   | zinc finger protein 37A                                    |
| <a href="#">Details</a> | 348 | 70 | hsa-miR-138-5p | <a href="#">ARRB1</a>    | arrestin beta 1                                            |
| <a href="#">Details</a> | 349 | 70 | hsa-miR-138-5p | <a href="#">LRRTM4</a>   | leucine rich repeat transmembrane neuronal 4               |
| <a href="#">Details</a> | 350 | 70 | hsa-miR-138-5p | <a href="#">RNASEH2C</a> | ribonuclease H2 subunit C                                  |
| <a href="#">Details</a> | 351 | 70 | hsa-miR-138-5p | <a href="#">SP100</a>    | SP100 nuclear antigen                                      |
| <a href="#">Details</a> | 352 | 70 | hsa-miR-138-5p | <a href="#">COQ9</a>     | coenzyme Q9                                                |
| <a href="#">Details</a> | 353 | 70 | hsa-miR-138-5p | <a href="#">SORCS2</a>   | sortilin related VPS10 domain containing receptor 2        |
| <a href="#">Details</a> | 354 | 70 | hsa-miR-138-5p | <a href="#">PTK6</a>     | protein tyrosine kinase 6                                  |
| <a href="#">Details</a> | 355 | 70 | hsa-miR-138-5p | <a href="#">ZFPM2</a>    | zinc finger protein, FOG family member 2                   |
| <a href="#">Details</a> | 356 | 69 | hsa-miR-138-5p | <a href="#">PDPN</a>     | podoplanin                                                 |
| <a href="#">Details</a> | 357 | 69 | hsa-miR-138-5p | <a href="#">CD109</a>    | CD109 molecule                                             |
| <a href="#">Details</a> | 358 | 69 | hsa-miR-138-5p | <a href="#">ANKS6</a>    | ankyrin repeat and sterile alpha motif domain containing 6 |
| <a href="#">Details</a> | 359 | 69 | hsa-miR-138-5p | <a href="#">ZBTB44</a>   | zinc finger and BTB domain containing 44                   |
| <a href="#">Details</a> | 360 | 69 | hsa-miR-138-5p | <a href="#">ING1</a>     | inhibitor of growth family member 1                        |
| <a href="#">Details</a> | 361 | 69 | hsa-miR-138-5p | <a href="#">HTRA2</a>    | HtrA serine peptidase 2                                    |
| <a href="#">Details</a> | 362 | 69 | hsa-miR-138-5p | <a href="#">DCAF10</a>   | DDB1 and CUL4 associated factor 10                         |

|                         |     |    |                |                         |                                                                  |
|-------------------------|-----|----|----------------|-------------------------|------------------------------------------------------------------|
| <a href="#">Details</a> | 363 | 69 | hsa-miR-138-5p | <a href="#">FAM122C</a> | family with sequence similarity 122C                             |
| <a href="#">Details</a> | 364 | 69 | hsa-miR-138-5p | <a href="#">STXBP6</a>  | syntaxin binding protein 6                                       |
| <a href="#">Details</a> | 365 | 69 | hsa-miR-138-5p | <a href="#">UBE2V1</a>  | ubiquitin conjugating enzyme E2 V1                               |
| <a href="#">Details</a> | 366 | 69 | hsa-miR-138-5p | <a href="#">PARP8</a>   | poly(ADP-ribose) polymerase family member 8                      |
| <a href="#">Details</a> | 367 | 69 | hsa-miR-138-5p | <a href="#">BPNT1</a>   | 3'(2'), 5'-bisphosphate nucleotidase 1                           |
| <a href="#">Details</a> | 368 | 69 | hsa-miR-138-5p | <a href="#">ZNF510</a>  | zinc finger protein 510                                          |
| <a href="#">Details</a> | 369 | 69 | hsa-miR-138-5p | <a href="#">ARMCX2</a>  | armadillo repeat containing X-linked 2                           |
| <a href="#">Details</a> | 370 | 69 | hsa-miR-138-5p | <a href="#">SOX13</a>   | SRY-box 13                                                       |
| <a href="#">Details</a> | 371 | 68 | hsa-miR-138-5p | <a href="#">H6PD</a>    | hexose-6-phosphate dehydrogenase/glucose 1-dehydrogenase         |
| <a href="#">Details</a> | 372 | 68 | hsa-miR-138-5p | <a href="#">MFSD4A</a>  | major facilitator superfamily domain containing 4A               |
| <a href="#">Details</a> | 373 | 68 | hsa-miR-138-5p | <a href="#">TERF2</a>   | telomeric repeat binding factor 2                                |
| <a href="#">Details</a> | 374 | 68 | hsa-miR-138-5p | <a href="#">CHST10</a>  | carbohydrate sulfotransferase 10                                 |
| <a href="#">Details</a> | 375 | 68 | hsa-miR-138-5p | <a href="#">SDC3</a>    | syndecan 3                                                       |
| <a href="#">Details</a> | 376 | 68 | hsa-miR-138-5p | <a href="#">TRPC7</a>   | transient receptor potential cation channel subfamily C member 7 |
| <a href="#">Details</a> | 377 | 68 | hsa-miR-138-5p | <a href="#">ZCCHC24</a> | zinc finger CCHC-type containing 24                              |
| <a href="#">Details</a> | 378 | 68 | hsa-miR-138-5p | <a href="#">SNX19</a>   | sorting nexin 19                                                 |
| <a href="#">Details</a> | 379 | 68 | hsa-miR-138-5p | <a href="#">OPRPN</a>   | opiorphin prepropeptide                                          |
| <a href="#">Details</a> | 380 | 68 | hsa-miR-138-5p | <a href="#">ZKSCAN4</a> | zinc finger with KRAB and SCAN domains 4                         |
| <a href="#">Details</a> | 381 | 68 | hsa-miR-138-5p | <a href="#">ADRA2A</a>  | adrenoceptor alpha 2A                                            |
| <a href="#">Details</a> | 382 | 68 | hsa-miR-138-5p | <a href="#">GPR143</a>  | G protein-coupled receptor 143                                   |
| <a href="#">Details</a> | 383 | 68 | hsa-miR-138-5p | <a href="#">MFAP3</a>   | microfibril associated protein 3                                 |
| <a href="#">Details</a> | 384 | 67 | hsa-miR-138-5p | <a href="#">MS4A2</a>   | membrane spanning 4-domains A2                                   |

|                         |     |    |                |                          |                                                           |
|-------------------------|-----|----|----------------|--------------------------|-----------------------------------------------------------|
| <a href="#">Details</a> | 385 | 67 | hsa-miR-138-5p | <a href="#">CHST11</a>   | carbohydrate sulfotransferase 11                          |
| <a href="#">Details</a> | 386 | 67 | hsa-miR-138-5p | <a href="#">ASXL3</a>    | ASXL transcriptional regulator 3                          |
| <a href="#">Details</a> | 387 | 67 | hsa-miR-138-5p | <a href="#">FFAR2</a>    | free fatty acid receptor 2                                |
| <a href="#">Details</a> | 388 | 67 | hsa-miR-138-5p | <a href="#">MYCN</a>     | MYCN proto-oncogene, bHLH transcription factor            |
| <a href="#">Details</a> | 389 | 67 | hsa-miR-138-5p | <a href="#">ENC1</a>     | ectodermal-neural cortex 1                                |
| <a href="#">Details</a> | 390 | 67 | hsa-miR-138-5p | <a href="#">FRMD4A</a>   | FERM domain containing 4A                                 |
| <a href="#">Details</a> | 391 | 67 | hsa-miR-138-5p | <a href="#">POLR1A</a>   | RNA polymerase I subunit A                                |
| <a href="#">Details</a> | 392 | 67 | hsa-miR-138-5p | <a href="#">MIER2</a>    | MIER family member 2                                      |
| <a href="#">Details</a> | 393 | 66 | hsa-miR-138-5p | <a href="#">GNAO1</a>    | G protein subunit alpha o1                                |
| <a href="#">Details</a> | 394 | 66 | hsa-miR-138-5p | <a href="#">ANO6</a>     | anoctamin 6                                               |
| <a href="#">Details</a> | 395 | 66 | hsa-miR-138-5p | <a href="#">SLC22A23</a> | solute carrier family 22 member 23                        |
| <a href="#">Details</a> | 396 | 66 | hsa-miR-138-5p | <a href="#">ST3GAL1</a>  | ST3 beta-galactoside alpha-2,3-sialyltransferase 1        |
| <a href="#">Details</a> | 397 | 66 | hsa-miR-138-5p | <a href="#">SNX20</a>    | sorting nexin 20                                          |
| <a href="#">Details</a> | 398 | 66 | hsa-miR-138-5p | <a href="#">PTP4A1</a>   | protein tyrosine phosphatase type IVA, member 1           |
| <a href="#">Details</a> | 399 | 66 | hsa-miR-138-5p | <a href="#">SLC20A1</a>  | solute carrier family 20 member 1                         |
| <a href="#">Details</a> | 400 | 66 | hsa-miR-138-5p | <a href="#">SEMA4C</a>   | semaphorin 4C                                             |
| <a href="#">Details</a> | 401 | 66 | hsa-miR-138-5p | <a href="#">KCP</a>      | kielin cysteine rich BMP regulator                        |
| <a href="#">Details</a> | 402 | 66 | hsa-miR-138-5p | <a href="#">APOBEC3G</a> | apolipoprotein B mRNA editing enzyme catalytic subunit 3G |
| <a href="#">Details</a> | 403 | 66 | hsa-miR-138-5p | <a href="#">SOX12</a>    | SRY-box 12                                                |
| <a href="#">Details</a> | 404 | 66 | hsa-miR-138-5p | <a href="#">STOX2</a>    | storkhead box 2                                           |
| <a href="#">Details</a> | 405 | 65 | hsa-miR-138-5p | <a href="#">DAP</a>      | death associated protein                                  |
| <a href="#">Details</a> | 406 | 65 | hsa-miR-138-5p | <a href="#">CCNYL1</a>   | cyclin Y like 1                                           |

|                         |     |    |                |                           |                                                                     |
|-------------------------|-----|----|----------------|---------------------------|---------------------------------------------------------------------|
| <a href="#">Details</a> | 407 | 65 | hsa-miR-138-5p | <a href="#">TMEM245</a>   | transmembrane protein 245                                           |
| <a href="#">Details</a> | 408 | 65 | hsa-miR-138-5p | <a href="#">AFF3</a>      | AF4/FMR2 family member 3                                            |
| <a href="#">Details</a> | 409 | 65 | hsa-miR-138-5p | <a href="#">FAM120AOS</a> | family with sequence similarity 120A opposite strand                |
| <a href="#">Details</a> | 410 | 65 | hsa-miR-138-5p | <a href="#">CCT5</a>      | chaperonin containing TCP1 subunit 5                                |
| <a href="#">Details</a> | 411 | 65 | hsa-miR-138-5p | <a href="#">SZRD1</a>     | SUZ RNA binding domain containing 1                                 |
| <a href="#">Details</a> | 412 | 65 | hsa-miR-138-5p | <a href="#">LHFPL3</a>    | LHFPL tetraspan subfamily member 3                                  |
| <a href="#">Details</a> | 413 | 65 | hsa-miR-138-5p | <a href="#">OPALIN</a>    | oligodendrocytic myelin paranodal and inner loop protein            |
| <a href="#">Details</a> | 414 | 65 | hsa-miR-138-5p | <a href="#">RNF180</a>    | ring finger protein 180                                             |
| <a href="#">Details</a> | 415 | 64 | hsa-miR-138-5p | <a href="#">SFXN2</a>     | sideroflexin 2                                                      |
| <a href="#">Details</a> | 416 | 64 | hsa-miR-138-5p | <a href="#">PGR</a>       | progesterone receptor                                               |
| <a href="#">Details</a> | 417 | 64 | hsa-miR-138-5p | <a href="#">TM7SF2</a>    | transmembrane 7 superfamily member 2                                |
| <a href="#">Details</a> | 418 | 64 | hsa-miR-138-5p | <a href="#">NOVA1</a>     | NOVA alternative splicing regulator 1                               |
| <a href="#">Details</a> | 419 | 64 | hsa-miR-138-5p | <a href="#">MAPK6</a>     | mitogen-activated protein kinase 6                                  |
| <a href="#">Details</a> | 420 | 64 | hsa-miR-138-5p | <a href="#">ARGLU1</a>    | arginine and glutamate rich 1                                       |
| <a href="#">Details</a> | 421 | 64 | hsa-miR-138-5p | <a href="#">ATP8B3</a>    | ATPase phospholipid transporting 8B3                                |
| <a href="#">Details</a> | 422 | 64 | hsa-miR-138-5p | <a href="#">NAPG</a>      | NSF attachment protein gamma                                        |
| <a href="#">Details</a> | 423 | 64 | hsa-miR-138-5p | <a href="#">APOBEC3B</a>  | apolipoprotein B mRNA editing enzyme catalytic subunit 3B           |
| <a href="#">Details</a> | 424 | 64 | hsa-miR-138-5p | <a href="#">ATP1A2</a>    | ATPase Na <sup>+</sup> /K <sup>+</sup> transporting subunit alpha 2 |
| <a href="#">Details</a> | 425 | 64 | hsa-miR-138-5p | <a href="#">ACTR8</a>     | ARP8 actin related protein 8 homolog                                |
| <a href="#">Details</a> | 426 | 64 | hsa-miR-138-5p | <a href="#">GIT1</a>      | GIT ArfGAP 1                                                        |
| <a href="#">Details</a> | 427 | 63 | hsa-miR-138-5p | <a href="#">CSTA</a>      | cystatin A                                                          |
| <a href="#">Details</a> | 428 | 63 | hsa-miR-138-5p | <a href="#">PXX</a>       | PX domain containing serine/threonine kinase like                   |

|                         |     |    |                |                         |                                                                 |
|-------------------------|-----|----|----------------|-------------------------|-----------------------------------------------------------------|
| <a href="#">Details</a> | 429 | 63 | hsa-miR-138-5p | <a href="#">NXF2</a>    | nuclear RNA export factor 2                                     |
| <a href="#">Details</a> | 430 | 63 | hsa-miR-138-5p | <a href="#">TMED10</a>  | transmembrane p24 trafficking protein 10                        |
| <a href="#">Details</a> | 431 | 63 | hsa-miR-138-5p | <a href="#">ZC3H7B</a>  | zinc finger CCCH-type containing 7B                             |
| <a href="#">Details</a> | 432 | 63 | hsa-miR-138-5p | <a href="#">TCF4</a>    | transcription factor 4                                          |
| <a href="#">Details</a> | 433 | 63 | hsa-miR-138-5p | <a href="#">SOX9</a>    | SRY-box 9                                                       |
| <a href="#">Details</a> | 434 | 63 | hsa-miR-138-5p | <a href="#">NTN1</a>    | netrin 1                                                        |
| <a href="#">Details</a> | 435 | 63 | hsa-miR-138-5p | <a href="#">FNDC8</a>   | fibronectin type III domain containing 8                        |
| <a href="#">Details</a> | 436 | 63 | hsa-miR-138-5p | <a href="#">EPB41</a>   | erythrocyte membrane protein band 4.1                           |
| <a href="#">Details</a> | 437 | 63 | hsa-miR-138-5p | <a href="#">TP63</a>    | tumor protein p63                                               |
| <a href="#">Details</a> | 438 | 63 | hsa-miR-138-5p | <a href="#">PDAP1</a>   | PDGFA associated protein 1                                      |
| <a href="#">Details</a> | 439 | 63 | hsa-miR-138-5p | <a href="#">NXF2B</a>   | nuclear RNA export factor 2B                                    |
| <a href="#">Details</a> | 440 | 62 | hsa-miR-138-5p | <a href="#">DNAJC10</a> | DnaJ heat shock protein family (Hsp40) member C10               |
| <a href="#">Details</a> | 441 | 62 | hsa-miR-138-5p | <a href="#">FBXO41</a>  | F-box protein 41                                                |
| <a href="#">Details</a> | 442 | 62 | hsa-miR-138-5p | <a href="#">CCDC3</a>   | coiled-coil domain containing 3                                 |
| <a href="#">Details</a> | 443 | 62 | hsa-miR-138-5p | <a href="#">LPP</a>     | LIM domain containing preferred translocation partner in lipoma |
| <a href="#">Details</a> | 444 | 62 | hsa-miR-138-5p | <a href="#">EML1</a>    | EMAP like 1                                                     |
| <a href="#">Details</a> | 445 | 62 | hsa-miR-138-5p | <a href="#">TESMIN</a>  | testis expressed metallothionein like protein                   |
| <a href="#">Details</a> | 446 | 62 | hsa-miR-138-5p | <a href="#">ZNF74</a>   | zinc finger protein 74                                          |
| <a href="#">Details</a> | 447 | 62 | hsa-miR-138-5p | <a href="#">MXD4</a>    | MAX dimerization protein 4                                      |
| <a href="#">Details</a> | 448 | 62 | hsa-miR-138-5p | <a href="#">EPPD1</a>   | endonuclease/exonuclease/phosphatase family domain containing 1 |
| <a href="#">Details</a> | 449 | 62 | hsa-miR-138-5p | <a href="#">DACH1</a>   | dachshund family transcription factor 1                         |
| <a href="#">Details</a> | 450 | 62 | hsa-miR-138-5p | <a href="#">AHDC1</a>   | AT-hook DNA binding motif containing 1                          |

|                         |     |    |                |                          |                                                     |
|-------------------------|-----|----|----------------|--------------------------|-----------------------------------------------------|
| <a href="#">Details</a> | 451 | 62 | hsa-miR-138-5p | <a href="#">SLC4A8</a>   | solute carrier family 4 member 8                    |
| <a href="#">Details</a> | 452 | 62 | hsa-miR-138-5p | <a href="#">SNX27</a>    | sorting nexin family member 27                      |
| <a href="#">Details</a> | 453 | 62 | hsa-miR-138-5p | <a href="#">FEZF2</a>    | FEZ family zinc finger 2                            |
| <a href="#">Details</a> | 454 | 62 | hsa-miR-138-5p | <a href="#">ADGRL1</a>   | adhesion G protein-coupled receptor L1              |
| <a href="#">Details</a> | 455 | 62 | hsa-miR-138-5p | <a href="#">PUM1</a>     | pumilio RNA binding family member 1                 |
| <a href="#">Details</a> | 456 | 62 | hsa-miR-138-5p | <a href="#">HMGXB4</a>   | HMG-box containing 4                                |
| <a href="#">Details</a> | 457 | 62 | hsa-miR-138-5p | <a href="#">TNFSF10</a>  | TNF superfamily member 10                           |
| <a href="#">Details</a> | 458 | 62 | hsa-miR-138-5p | <a href="#">NAT16</a>    | N-acetyltransferase 16 (putative)                   |
| <a href="#">Details</a> | 459 | 62 | hsa-miR-138-5p | <a href="#">ENG</a>      | endoglin                                            |
| <a href="#">Details</a> | 460 | 62 | hsa-miR-138-5p | <a href="#">POTEM</a>    | POTE ankyrin domain family member M                 |
| <a href="#">Details</a> | 461 | 62 | hsa-miR-138-5p | <a href="#">MEGF10</a>   | multiple EGF like domains 10                        |
| <a href="#">Details</a> | 462 | 62 | hsa-miR-138-5p | <a href="#">CACNA1E</a>  | calcium voltage-gated channel subunit alpha1 E      |
| <a href="#">Details</a> | 463 | 62 | hsa-miR-138-5p | <a href="#">TMEM182</a>  | transmembrane protein 182                           |
| <a href="#">Details</a> | 464 | 62 | hsa-miR-138-5p | <a href="#">ZDHHC3</a>   | zinc finger DHHC-type containing 3                  |
| <a href="#">Details</a> | 465 | 62 | hsa-miR-138-5p | <a href="#">PPARGC1B</a> | PPARG coactivator 1 beta                            |
| <a href="#">Details</a> | 466 | 61 | hsa-miR-138-5p | <a href="#">MANEAL</a>   | mannosidase endo-alpha like                         |
| <a href="#">Details</a> | 467 | 61 | hsa-miR-138-5p | <a href="#">WDR45B</a>   | WD repeat domain 45B                                |
| <a href="#">Details</a> | 468 | 61 | hsa-miR-138-5p | <a href="#">TBC1D4</a>   | TBC1 domain family member 4                         |
| <a href="#">Details</a> | 469 | 61 | hsa-miR-138-5p | <a href="#">ZNF607</a>   | zinc finger protein 607                             |
| <a href="#">Details</a> | 470 | 61 | hsa-miR-138-5p | <a href="#">ZNF705D</a>  | zinc finger protein 705D                            |
| <a href="#">Details</a> | 471 | 61 | hsa-miR-138-5p | <a href="#">SYS1</a>     | SYS1, golgi trafficking protein                     |
| <a href="#">Details</a> | 472 | 61 | hsa-miR-138-5p | <a href="#">IGF2BP1</a>  | insulin like growth factor 2 mRNA binding protein 1 |

|                         |     |    |                |                         |                                                                            |
|-------------------------|-----|----|----------------|-------------------------|----------------------------------------------------------------------------|
| <a href="#">Details</a> | 473 | 61 | hsa-miR-138-5p | <a href="#">MACF1</a>   | microtubule-actin crosslinking factor 1                                    |
| <a href="#">Details</a> | 474 | 61 | hsa-miR-138-5p | <a href="#">C7orf33</a> | chromosome 7 open reading frame 33                                         |
| <a href="#">Details</a> | 475 | 61 | hsa-miR-138-5p | <a href="#">YEATS2</a>  | YEATS domain containing 2                                                  |
| <a href="#">Details</a> | 476 | 61 | hsa-miR-138-5p | <a href="#">SNCB</a>    | synuclein beta                                                             |
| <a href="#">Details</a> | 477 | 61 | hsa-miR-138-5p | <a href="#">CTDSPL2</a> | CTD small phosphatase like 2                                               |
| <a href="#">Details</a> | 478 | 61 | hsa-miR-138-5p | <a href="#">SEL1L</a>   | SEL1L, ERAD E3 ligase adaptor subunit                                      |
| <a href="#">Details</a> | 479 | 61 | hsa-miR-138-5p | <a href="#">KSR2</a>    | kinase suppressor of ras 2                                                 |
| <a href="#">Details</a> | 480 | 61 | hsa-miR-138-5p | <a href="#">SMG1</a>    | SMG1, nonsense mediated mRNA decay associated PI3K related kinase          |
| <a href="#">Details</a> | 481 | 61 | hsa-miR-138-5p | <a href="#">ANKRD44</a> | ankyrin repeat domain 44                                                   |
| <a href="#">Details</a> | 482 | 61 | hsa-miR-138-5p | <a href="#">MAPKBP1</a> | mitogen-activated protein kinase binding protein 1                         |
| <a href="#">Details</a> | 483 | 61 | hsa-miR-138-5p | <a href="#">IER5L</a>   | immediate early response 5 like                                            |
| <a href="#">Details</a> | 484 | 61 | hsa-miR-138-5p | <a href="#">MC1R</a>    | melanocortin 1 receptor                                                    |
| <a href="#">Details</a> | 485 | 60 | hsa-miR-138-5p | <a href="#">CCDC124</a> | coiled-coil domain containing 124                                          |
| <a href="#">Details</a> | 486 | 60 | hsa-miR-138-5p | <a href="#">VAPB</a>    | VAMP associated protein B and C                                            |
| <a href="#">Details</a> | 487 | 60 | hsa-miR-138-5p | <a href="#">FTO</a>     | FTO, alpha-ketoglutarate dependent dioxygenase                             |
| <a href="#">Details</a> | 488 | 60 | hsa-miR-138-5p | <a href="#">CCAR2</a>   | cell cycle and apoptosis regulator 2                                       |
| <a href="#">Details</a> | 489 | 60 | hsa-miR-138-5p | <a href="#">MGAT5B</a>  | alpha-1,6-mannosylglycoprotein<br>6-beta-N-acetylglucosaminyltransferase B |
| <a href="#">Details</a> | 490 | 60 | hsa-miR-138-5p | <a href="#">ZNF705A</a> | zinc finger protein 705A                                                   |
| <a href="#">Details</a> | 491 | 60 | hsa-miR-138-5p | <a href="#">ZRANB1</a>  | zinc finger RANBP2-type containing 1                                       |
| <a href="#">Details</a> | 492 | 60 | hsa-miR-138-5p | <a href="#">RAVER1</a>  | ribonucleoprotein, PTB binding 1                                           |
| <a href="#">Details</a> | 493 | 60 | hsa-miR-138-5p | <a href="#">PDLIM5</a>  | PDZ and LIM domain 5                                                       |

|                         |     |    |                |                                |                                                                |
|-------------------------|-----|----|----------------|--------------------------------|----------------------------------------------------------------|
| <a href="#">Details</a> | 494 | 60 | hsa-miR-138-5p | <a href="#">BRI3BP</a>         | BRI3 binding protein                                           |
| <a href="#">Details</a> | 495 | 60 | hsa-miR-138-5p | <a href="#">RTN4RL2</a>        | reticulon 4 receptor like 2                                    |
| <a href="#">Details</a> | 496 | 60 | hsa-miR-138-5p | <a href="#">ZNF292</a>         | zinc finger protein 292                                        |
| <a href="#">Details</a> | 497 | 60 | hsa-miR-138-5p | <a href="#">SEMA6A</a>         | semaphorin 6A                                                  |
| <a href="#">Details</a> | 498 | 60 | hsa-miR-138-5p | <a href="#">ZNF705E</a>        | zinc finger protein 705E                                       |
| <a href="#">Details</a> | 499 | 60 | hsa-miR-138-5p | <a href="#">TMEM189-UBE2V1</a> | TMEM189-UBE2V1 readthrough                                     |
| <a href="#">Details</a> | 500 | 60 | hsa-miR-138-5p | <a href="#">NOS3</a>           | nitric oxide synthase 3                                        |
| <a href="#">Details</a> | 501 | 59 | hsa-miR-138-5p | <a href="#">NEXMIF</a>         | neurite extension and migration factor                         |
| <a href="#">Details</a> | 502 | 59 | hsa-miR-138-5p | <a href="#">MIF4GD</a>         | MIF4G domain containing                                        |
| <a href="#">Details</a> | 503 | 59 | hsa-miR-138-5p | <a href="#">FOXL2NB</a>        | FOXL2 neighbor                                                 |
| <a href="#">Details</a> | 504 | 59 | hsa-miR-138-5p | <a href="#">SPECC1</a>         | sperm antigen with calponin homology and coiled-coil domains 1 |
| <a href="#">Details</a> | 505 | 59 | hsa-miR-138-5p | <a href="#">NEBL</a>           | nebulette                                                      |
| <a href="#">Details</a> | 506 | 59 | hsa-miR-138-5p | <a href="#">THAP1</a>          | THAP domain containing 1                                       |
| <a href="#">Details</a> | 507 | 59 | hsa-miR-138-5p | <a href="#">RPA1</a>           | replication protein A1                                         |
| <a href="#">Details</a> | 508 | 59 | hsa-miR-138-5p | <a href="#">GALNTL6</a>        | polypeptide N-acetylgalactosaminyltransferase like 6           |
| <a href="#">Details</a> | 509 | 59 | hsa-miR-138-5p | <a href="#">TCEAL5</a>         | transcription elongation factor A like 5                       |
| <a href="#">Details</a> | 510 | 59 | hsa-miR-138-5p | <a href="#">ULBP1</a>          | UL16 binding protein 1                                         |
| <a href="#">Details</a> | 511 | 59 | hsa-miR-138-5p | <a href="#">EFCAB14</a>        | EF-hand calcium binding domain 14                              |
| <a href="#">Details</a> | 512 | 59 | hsa-miR-138-5p | <a href="#">PLEKHG4B</a>       | pleckstrin homology and RhoGEF domain containing G4B           |
| <a href="#">Details</a> | 513 | 58 | hsa-miR-138-5p | <a href="#">RIMBP3C</a>        | RIMS binding protein 3C                                        |
| <a href="#">Details</a> | 514 | 58 | hsa-miR-138-5p | <a href="#">DHH</a>            | desert hedgehog signaling molecule                             |



|                         |     |    |                |                          |                                                        |
|-------------------------|-----|----|----------------|--------------------------|--------------------------------------------------------|
| <a href="#">Details</a> | 515 | 58 | hsa-miR-138-5p | <a href="#">MYD88</a>    | MYD88, innate immune signal transduction adaptor       |
| <a href="#">Details</a> | 516 | 58 | hsa-miR-138-5p | <a href="#">NOVA2</a>    | NOVA alternative splicing regulator 2                  |
| <a href="#">Details</a> | 517 | 58 | hsa-miR-138-5p | <a href="#">C2CD2L</a>   | C2CD2 like                                             |
| <a href="#">Details</a> | 518 | 58 | hsa-miR-138-5p | <a href="#">RIMBP3B</a>  | RIMS binding protein 3B                                |
| <a href="#">Details</a> | 519 | 58 | hsa-miR-138-5p | <a href="#">USP47</a>    | ubiquitin specific peptidase 47                        |
| <a href="#">Details</a> | 520 | 58 | hsa-miR-138-5p | <a href="#">STAMPB</a>   | STAM binding protein                                   |
| <a href="#">Details</a> | 521 | 58 | hsa-miR-138-5p | <a href="#">ADGRL3</a>   | adhesion G protein-coupled receptor L3                 |
| <a href="#">Details</a> | 522 | 58 | hsa-miR-138-5p | <a href="#">TCF12</a>    | transcription factor 12                                |
| <a href="#">Details</a> | 523 | 58 | hsa-miR-138-5p | <a href="#">RIMBP3</a>   | RIMS binding protein 3                                 |
| <a href="#">Details</a> | 524 | 58 | hsa-miR-138-5p | <a href="#">IPO8</a>     | importin 8                                             |
| <a href="#">Details</a> | 525 | 58 | hsa-miR-138-5p | <a href="#">SKP2</a>     | S-phase kinase associated protein 2                    |
| <a href="#">Details</a> | 526 | 58 | hsa-miR-138-5p | <a href="#">TNRC6B</a>   | trinucleotide repeat containing 6B                     |
| <a href="#">Details</a> | 527 | 58 | hsa-miR-138-5p | <a href="#">TP53INP2</a> | tumor protein p53 inducible nuclear protein 2          |
| <a href="#">Details</a> | 528 | 58 | hsa-miR-138-5p | <a href="#">STPG4</a>    | sperm-tail PG-rich repeat containing 4                 |
| <a href="#">Details</a> | 529 | 58 | hsa-miR-138-5p | <a href="#">DHTKD1</a>   | dehydrogenase E1 and transketolase domain containing 1 |
| <a href="#">Details</a> | 530 | 58 | hsa-miR-138-5p | <a href="#">SLC7A2</a>   | solute carrier family 7 member 2                       |
| <a href="#">Details</a> | 531 | 58 | hsa-miR-138-5p | <a href="#">H2AFX</a>    | H2A histone family member X                            |
| <a href="#">Details</a> | 532 | 57 | hsa-miR-138-5p | <a href="#">RTN1</a>     | reticulon 1                                            |
| <a href="#">Details</a> | 533 | 57 | hsa-miR-138-5p | <a href="#">SYN1</a>     | synapsin I                                             |
| <a href="#">Details</a> | 534 | 57 | hsa-miR-138-5p | <a href="#">TMEM104</a>  | transmembrane protein 104                              |
| <a href="#">Details</a> | 535 | 57 | hsa-miR-138-5p | <a href="#">PHOX2B</a>   | paired like homeobox 2B                                |
| <a href="#">Details</a> | 536 | 57 | hsa-miR-138-5p | <a href="#">AREL1</a>    | apoptosis resistant E3 ubiquitin protein ligase 1      |

|                         |     |    |                |                          |                                                    |
|-------------------------|-----|----|----------------|--------------------------|----------------------------------------------------|
| <a href="#">Details</a> | 537 | 57 | hsa-miR-138-5p | <a href="#">MOV10</a>    | Mov10 RISC complex RNA helicase                    |
| <a href="#">Details</a> | 538 | 57 | hsa-miR-138-5p | <a href="#">ZFP90</a>    | ZFP90 zinc finger protein                          |
| <a href="#">Details</a> | 539 | 57 | hsa-miR-138-5p | <a href="#">GPR26</a>    | G protein-coupled receptor 26                      |
| <a href="#">Details</a> | 540 | 57 | hsa-miR-138-5p | <a href="#">USP49</a>    | ubiquitin specific peptidase 49                    |
| <a href="#">Details</a> | 541 | 57 | hsa-miR-138-5p | <a href="#">MOCS1</a>    | molybdenum cofactor synthesis 1                    |
| <a href="#">Details</a> | 542 | 56 | hsa-miR-138-5p | <a href="#">EPB41L4B</a> | erythrocyte membrane protein band 4.1 like 4B      |
| <a href="#">Details</a> | 543 | 56 | hsa-miR-138-5p | <a href="#">ZKSCAN3</a>  | zinc finger with KRAB and SCAN domains 3           |
| <a href="#">Details</a> | 544 | 56 | hsa-miR-138-5p | <a href="#">SUFU</a>     | SUFU negative regulator of hedgehog signaling      |
| <a href="#">Details</a> | 545 | 56 | hsa-miR-138-5p | <a href="#">GLT1D1</a>   | glycosyltransferase 1 domain containing 1          |
| <a href="#">Details</a> | 546 | 56 | hsa-miR-138-5p | <a href="#">SIX5</a>     | SIX homeobox 5                                     |
| <a href="#">Details</a> | 547 | 56 | hsa-miR-138-5p | <a href="#">KDM8</a>     | lysine demethylase 8                               |
| <a href="#">Details</a> | 548 | 56 | hsa-miR-138-5p | <a href="#">STRA6</a>    | stimulated by retinoic acid 6                      |
| <a href="#">Details</a> | 549 | 56 | hsa-miR-138-5p | <a href="#">MAP2K7</a>   | mitogen-activated protein kinase kinase 7          |
| <a href="#">Details</a> | 550 | 56 | hsa-miR-138-5p | <a href="#">GAMT</a>     | guanidinoacetate N-methyltransferase               |
| <a href="#">Details</a> | 551 | 56 | hsa-miR-138-5p | <a href="#">ZNF483</a>   | zinc finger protein 483                            |
| <a href="#">Details</a> | 552 | 56 | hsa-miR-138-5p | <a href="#">SOX7</a>     | SRY-box 7                                          |
| <a href="#">Details</a> | 553 | 56 | hsa-miR-138-5p | <a href="#">SLC25A36</a> | solute carrier family 25 member 36                 |
| <a href="#">Details</a> | 554 | 56 | hsa-miR-138-5p | <a href="#">FRMD7</a>    | FERM domain containing 7                           |
| <a href="#">Details</a> | 555 | 56 | hsa-miR-138-5p | <a href="#">SPATA13</a>  | spermatogenesis associated 13                      |
| <a href="#">Details</a> | 556 | 56 | hsa-miR-138-5p | <a href="#">RAB3GAP1</a> | RAB3 GTPase activating protein catalytic subunit 1 |
| <a href="#">Details</a> | 557 | 55 | hsa-miR-138-5p | <a href="#">DLK1</a>     | delta like non-canonical Notch ligand 1            |
| <a href="#">Details</a> | 558 | 55 | hsa-miR-138-5p | <a href="#">HSPA4L</a>   | heat shock protein family A (Hsp70) member 4 like  |

|                         |     |    |                |                         |                                                     |
|-------------------------|-----|----|----------------|-------------------------|-----------------------------------------------------|
| <a href="#">Details</a> | 559 | 55 | hsa-miR-138-5p | <a href="#">NSD3</a>    | nuclear receptor binding SET domain protein 3       |
| <a href="#">Details</a> | 560 | 55 | hsa-miR-138-5p | <a href="#">CHRD1</a>   | chordin like 1                                      |
| <a href="#">Details</a> | 561 | 55 | hsa-miR-138-5p | <a href="#">SNX30</a>   | sorting nexin family member 30                      |
| <a href="#">Details</a> | 562 | 55 | hsa-miR-138-5p | <a href="#">MYH15</a>   | myosin heavy chain 15                               |
| <a href="#">Details</a> | 563 | 55 | hsa-miR-138-5p | <a href="#">GOSR1</a>   | golgi SNAP receptor complex member 1                |
| <a href="#">Details</a> | 564 | 55 | hsa-miR-138-5p | <a href="#">PSMF1</a>   | proteasome inhibitor subunit 1                      |
| <a href="#">Details</a> | 565 | 55 | hsa-miR-138-5p | <a href="#">PLEKHO2</a> | pleckstrin homology domain containing O2            |
| <a href="#">Details</a> | 566 | 55 | hsa-miR-138-5p | <a href="#">PCDH18</a>  | protocadherin 18                                    |
| <a href="#">Details</a> | 567 | 55 | hsa-miR-138-5p | <a href="#">BLVRA</a>   | biliverdin reductase A                              |
| <a href="#">Details</a> | 568 | 55 | hsa-miR-138-5p | <a href="#">SSH2</a>    | slingshot protein phosphatase 2                     |
| <a href="#">Details</a> | 569 | 55 | hsa-miR-138-5p | <a href="#">FYCO1</a>   | FYVE and coiled-coil domain containing 1            |
| <a href="#">Details</a> | 570 | 55 | hsa-miR-138-5p | <a href="#">ATF7</a>    | activating transcription factor 7                   |
| <a href="#">Details</a> | 571 | 55 | hsa-miR-138-5p | <a href="#">AKT3</a>    | AKT serine/threonine kinase 3                       |
| <a href="#">Details</a> | 572 | 55 | hsa-miR-138-5p | <a href="#">POM121</a>  | POM121 transmembrane nucleoporin                    |
| <a href="#">Details</a> | 573 | 55 | hsa-miR-138-5p | <a href="#">MEGF6</a>   | multiple EGF like domains 6                         |
| <a href="#">Details</a> | 574 | 55 | hsa-miR-138-5p | <a href="#">DENND1A</a> | DENN domain containing 1A                           |
| <a href="#">Details</a> | 575 | 54 | hsa-miR-138-5p | <a href="#">ANGPT2</a>  | angiopoietin 2                                      |
| <a href="#">Details</a> | 576 | 54 | hsa-miR-138-5p | <a href="#">HS6ST3</a>  | heparan sulfate 6-O-sulfotransferase 3              |
| <a href="#">Details</a> | 577 | 54 | hsa-miR-138-5p | <a href="#">PPP1R42</a> | protein phosphatase 1 regulatory subunit 42         |
| <a href="#">Details</a> | 578 | 54 | hsa-miR-138-5p | <a href="#">KDM6B</a>   | lysine demethylase 6B                               |
| <a href="#">Details</a> | 579 | 54 | hsa-miR-138-5p | <a href="#">JARID2</a>  | jumonji and AT-rich interaction domain containing 2 |
| <a href="#">Details</a> | 580 | 54 | hsa-miR-138-5p | <a href="#">ST3GAL6</a> | ST3 beta-galactoside alpha-2,3-sialyltransferase 6  |

|                         |     |    |                |                          |                                                      |
|-------------------------|-----|----|----------------|--------------------------|------------------------------------------------------|
| <a href="#">Details</a> | 581 | 54 | hsa-miR-138-5p | <a href="#">TMEM199</a>  | transmembrane protein 199                            |
| <a href="#">Details</a> | 582 | 54 | hsa-miR-138-5p | <a href="#">GALNT6</a>   | polypeptide N-acetylgalactosaminyltransferase 6      |
| <a href="#">Details</a> | 583 | 54 | hsa-miR-138-5p | <a href="#">CCDC68</a>   | coiled-coil domain containing 68                     |
| <a href="#">Details</a> | 584 | 54 | hsa-miR-138-5p | <a href="#">SLC39A9</a>  | solute carrier family 39 member 9                    |
| <a href="#">Details</a> | 585 | 54 | hsa-miR-138-5p | <a href="#">TAOK1</a>    | TAO kinase 1                                         |
| <a href="#">Details</a> | 586 | 54 | hsa-miR-138-5p | <a href="#">CAMK2A</a>   | calcium/calmodulin dependent protein kinase II alpha |
| <a href="#">Details</a> | 587 | 54 | hsa-miR-138-5p | <a href="#">C19orf66</a> | chromosome 19 open reading frame 66                  |
| <a href="#">Details</a> | 588 | 54 | hsa-miR-138-5p | <a href="#">SPEG</a>     | striated muscle enriched protein kinase              |
| <a href="#">Details</a> | 589 | 54 | hsa-miR-138-5p | <a href="#">INHBB</a>    | inhibin subunit beta B                               |
| <a href="#">Details</a> | 590 | 54 | hsa-miR-138-5p | <a href="#">APH1A</a>    | aph-1 homolog A, gamma-secretase subunit             |
| <a href="#">Details</a> | 591 | 53 | hsa-miR-138-5p | <a href="#">FOSL1</a>    | FOS like 1, AP-1 transcription factor subunit        |
| <a href="#">Details</a> | 592 | 53 | hsa-miR-138-5p | <a href="#">FBXO10</a>   | F-box protein 10                                     |
| <a href="#">Details</a> | 593 | 53 | hsa-miR-138-5p | <a href="#">DYNLT3</a>   | dynein light chain Tctex-type 3                      |
| <a href="#">Details</a> | 594 | 53 | hsa-miR-138-5p | <a href="#">C3orf52</a>  | chromosome 3 open reading frame 52                   |
| <a href="#">Details</a> | 595 | 53 | hsa-miR-138-5p | <a href="#">FAM104A</a>  | family with sequence similarity 104 member A         |
| <a href="#">Details</a> | 596 | 53 | hsa-miR-138-5p | <a href="#">UBE2R2</a>   | ubiquitin conjugating enzyme E2 R2                   |
| <a href="#">Details</a> | 597 | 53 | hsa-miR-138-5p | <a href="#">MICB</a>     | MHC class I polypeptide-related sequence B           |
| <a href="#">Details</a> | 598 | 53 | hsa-miR-138-5p | <a href="#">TNFAIP8</a>  | TNF alpha induced protein 8                          |
| <a href="#">Details</a> | 599 | 53 | hsa-miR-138-5p | <a href="#">DGKG</a>     | diacylglycerol kinase gamma                          |
| <a href="#">Details</a> | 600 | 53 | hsa-miR-138-5p | <a href="#">HPCAL4</a>   | hippocalcin like 4                                   |
| <a href="#">Details</a> | 601 | 53 | hsa-miR-138-5p | <a href="#">DHRS7</a>    | dehydrogenase/reductase 7                            |
| <a href="#">Details</a> | 602 | 53 | hsa-miR-138-5p | <a href="#">CLEC16A</a>  | C-type lectin domain containing 16A                  |

|                         |     |    |                |                          |                                                               |
|-------------------------|-----|----|----------------|--------------------------|---------------------------------------------------------------|
| <a href="#">Details</a> | 603 | 53 | hsa-miR-138-5p | <a href="#">ELMOD3</a>   | ELMO domain containing 3                                      |
| <a href="#">Details</a> | 604 | 53 | hsa-miR-138-5p | <a href="#">CACNA2D1</a> | calcium voltage-gated channel auxiliary subunit alpha2delta 1 |
| <a href="#">Details</a> | 605 | 53 | hsa-miR-138-5p | <a href="#">KRTAP4-2</a> | keratin associated protein 4-2                                |
| <a href="#">Details</a> | 606 | 52 | hsa-miR-138-5p | <a href="#">VPS53</a>    | VPS53, GARP complex subunit                                   |
| <a href="#">Details</a> | 607 | 52 | hsa-miR-138-5p | <a href="#">TCF7L1</a>   | transcription factor 7 like 1                                 |
| <a href="#">Details</a> | 608 | 52 | hsa-miR-138-5p | <a href="#">ZNF624</a>   | zinc finger protein 624                                       |
| <a href="#">Details</a> | 609 | 52 | hsa-miR-138-5p | <a href="#">MGRN1</a>    | mahogunin ring finger 1                                       |
| <a href="#">Details</a> | 610 | 52 | hsa-miR-138-5p | <a href="#">ELP5</a>     | elongator acetyltransferase complex subunit 5                 |
| <a href="#">Details</a> | 611 | 52 | hsa-miR-138-5p | <a href="#">PSD3</a>     | pleckstrin and Sec7 domain containing 3                       |
| <a href="#">Details</a> | 612 | 52 | hsa-miR-138-5p | <a href="#">RDH8</a>     | retinol dehydrogenase 8                                       |
| <a href="#">Details</a> | 613 | 52 | hsa-miR-138-5p | <a href="#">BCL2L11</a>  | BCL2 like 11                                                  |
| <a href="#">Details</a> | 614 | 52 | hsa-miR-138-5p | <a href="#">ZDHHC8</a>   | zinc finger DHHC-type containing 8                            |
| <a href="#">Details</a> | 615 | 52 | hsa-miR-138-5p | <a href="#">WTIP</a>     | WT1 interacting protein                                       |
| <a href="#">Details</a> | 616 | 52 | hsa-miR-138-5p | <a href="#">EDC3</a>     | enhancer of mRNA decapping 3                                  |
| <a href="#">Details</a> | 617 | 52 | hsa-miR-138-5p | <a href="#">LRRFIP1</a>  | LRR binding FLII interacting protein 1                        |
| <a href="#">Details</a> | 618 | 52 | hsa-miR-138-5p | <a href="#">MUC6</a>     | mucin 6, oligomeric mucus/gel-forming                         |
| <a href="#">Details</a> | 619 | 52 | hsa-miR-138-5p | <a href="#">BNIP3L</a>   | BCL2 interacting protein 3 like                               |
| <a href="#">Details</a> | 620 | 52 | hsa-miR-138-5p | <a href="#">RNF19A</a>   | ring finger protein 19A, RBR E3 ubiquitin protein ligase      |
| <a href="#">Details</a> | 621 | 52 | hsa-miR-138-5p | <a href="#">NETO1</a>    | neuropilin and tolloid like 1                                 |
| <a href="#">Details</a> | 622 | 52 | hsa-miR-138-5p | <a href="#">PTPN2</a>    | protein tyrosine phosphatase, non-receptor type 2             |
| <a href="#">Details</a> | 623 | 52 | hsa-miR-138-5p | <a href="#">NTM</a>      | neurotrimin                                                   |
| <a href="#">Details</a> | 624 | 52 | hsa-miR-138-5p | <a href="#">ERCC4</a>    | ERCC excision repair 4, endonuclease catalytic subunit        |

|                         |     |    |                |                         |                                                                 |
|-------------------------|-----|----|----------------|-------------------------|-----------------------------------------------------------------|
| <a href="#">Details</a> | 625 | 51 | hsa-miR-138-5p | <a href="#">KLHL25</a>  | kelch like family member 25                                     |
| <a href="#">Details</a> | 626 | 51 | hsa-miR-138-5p | <a href="#">NXN</a>     | nucleoredoxin                                                   |
| <a href="#">Details</a> | 627 | 51 | hsa-miR-138-5p | <a href="#">DGKE</a>    | diacylglycerol kinase epsilon                                   |
| <a href="#">Details</a> | 628 | 51 | hsa-miR-138-5p | <a href="#">SLC24A2</a> | solute carrier family 24 member 2                               |
| <a href="#">Details</a> | 629 | 51 | hsa-miR-138-5p | <a href="#">TXLNG</a>   | taxilin gamma                                                   |
| <a href="#">Details</a> | 630 | 51 | hsa-miR-138-5p | <a href="#">PLAU</a>    | plasminogen activator, urokinase                                |
| <a href="#">Details</a> | 631 | 51 | hsa-miR-138-5p | <a href="#">CD274</a>   | CD274 molecule                                                  |
| <a href="#">Details</a> | 632 | 51 | hsa-miR-138-5p | <a href="#">GOLGA3</a>  | golgin A3                                                       |
| <a href="#">Details</a> | 633 | 51 | hsa-miR-138-5p | <a href="#">RSPH3</a>   | radial spoke head 3 homolog                                     |
| <a href="#">Details</a> | 634 | 51 | hsa-miR-138-5p | <a href="#">SNX33</a>   | sorting nexin 33                                                |
| <a href="#">Details</a> | 635 | 51 | hsa-miR-138-5p | <a href="#">MECP2</a>   | methyl-CpG binding protein 2                                    |
| <a href="#">Details</a> | 636 | 51 | hsa-miR-138-5p | <a href="#">CUL5</a>    | cullin 5                                                        |
| <a href="#">Details</a> | 637 | 51 | hsa-miR-138-5p | <a href="#">GM2A</a>    | GM2 ganglioside activator                                       |
| <a href="#">Details</a> | 638 | 51 | hsa-miR-138-5p | <a href="#">SCAI</a>    | suppressor of cancer cell invasion                              |
| <a href="#">Details</a> | 639 | 51 | hsa-miR-138-5p | <a href="#">GNAT1</a>   | G protein subunit alpha transducin 1                            |
| <a href="#">Details</a> | 640 | 51 | hsa-miR-138-5p | <a href="#">KIF13A</a>  | kinesin family member 13A                                       |
| <a href="#">Details</a> | 641 | 51 | hsa-miR-138-5p | <a href="#">PLIN4</a>   | perilipin 4                                                     |
| <a href="#">Details</a> | 642 | 51 | hsa-miR-138-5p | <a href="#">PLPP6</a>   | phospholipid phosphatase 6                                      |
| <a href="#">Details</a> | 643 | 51 | hsa-miR-138-5p | <a href="#">SLC29A3</a> | solute carrier family 29 member 3                               |
| <a href="#">Details</a> | 644 | 51 | hsa-miR-138-5p | <a href="#">SPOCK3</a>  | SPARC (osteonectin), cwcv and kazal like domains proteoglycan 3 |
| <a href="#">Details</a> | 645 | 51 | hsa-miR-138-5p | <a href="#">MSANTD2</a> | Myb/SANT DNA binding domain containing 2                        |
| <a href="#">Details</a> | 646 | 51 | hsa-miR-138-5p | <a href="#">VPS26B</a>  | VPS26, retromer complex component B                             |

|                         |     |    |                |                         |                                                               |
|-------------------------|-----|----|----------------|-------------------------|---------------------------------------------------------------|
| <a href="#">Details</a> | 647 | 50 | hsa-miR-138-5p | <a href="#">CSRNP3</a>  | cysteine and serine rich nuclear protein 3                    |
| <a href="#">Details</a> | 648 | 50 | hsa-miR-138-5p | <a href="#">MYO5C</a>   | myosin VC                                                     |
| <a href="#">Details</a> | 649 | 50 | hsa-miR-138-5p | <a href="#">USP18</a>   | ubiquitin specific peptidase 18                               |
| <a href="#">Details</a> | 650 | 50 | hsa-miR-138-5p | <a href="#">TMEM143</a> | transmembrane protein 143                                     |
| <a href="#">Details</a> | 651 | 50 | hsa-miR-138-5p | <a href="#">LIX1</a>    | limb and CNS expressed 1                                      |
| <a href="#">Details</a> | 652 | 50 | hsa-miR-138-5p | <a href="#">CMTM3</a>   | CKLF like MARVEL transmembrane domain containing 3            |
| <a href="#">Details</a> | 653 | 50 | hsa-miR-138-5p | <a href="#">TMEM38B</a> | transmembrane protein 38B                                     |
| <a href="#">Details</a> | 654 | 50 | hsa-miR-138-5p | <a href="#">ZHX2</a>    | zinc fingers and homeoboxes 2                                 |
| <a href="#">Details</a> | 655 | 50 | hsa-miR-138-5p | <a href="#">LETM2</a>   | leucine zipper and EF-hand containing transmembrane protein 2 |
| <a href="#">Details</a> | 656 | 50 | hsa-miR-138-5p | <a href="#">TREML1</a>  | triggering receptor expressed on myeloid cells like 1         |
| <a href="#">Details</a> | 657 | 50 | hsa-miR-138-5p | <a href="#">DYNLT1</a>  | dynein light chain Tctex-type 1                               |
